# Supplementary material
Source: PubMed Central journal article supplement (PMC2736129)
Supplement: NIHMS100363-supplement-1.pdf [file NIHMS100363-supplement-1.pdf]

# **SUPPORTING INFORMATION**

## **Cu(II) Bis(thiosemicarbazone) Radiopharmaceutical Binding to Serum Albumin: Further Definition of Species-Dependence and Associated Substituent Effects**

Nathan E. Basken, Mark A. Green

Division of Nuclear Pharmacy,

Department of Industrial and Physical Pharmacy,

Purdue University, West Lafayette, IN USA

### **Contents**

- Supplementary Figure 1. Mammal Serum Albumin Sequence Homology Matrix
- Supplementary Figure 2. Stereoview of the HSA IIA Drug Binding Site
- Supplementary Figure 3. Stereoview of HSA-bound Warfarin and Phenylbutazone
- Supplementary Table 1. Amino Acid Sequences
- Supplementary Table 2. Amino Acid Sequences in Selected Mammalian Serum Albumins

**Figure 1.** Mammal Serum Albumin Sequence Homology Matrix. This figure shows the Smith-Waterman scores, and % identity values (shaded) for 17 mammal species. The values for the comparisons to HSA are indicated in bold.

|               | Human       | Cow         | Elephant    | Gerbil      | Mouse       | Rat         | Orangutan    | Vole        | Dog         | Cat         | Pig         | Sheep       | Donkey      | Horse       | Rabbit      | Rhesus Monkey | Guinea Pig  |
|---------------|-------------|-------------|-------------|-------------|-------------|-------------|--------------|-------------|-------------|-------------|-------------|-------------|-------------|-------------|-------------|---------------|-------------|
| Human         | <b>3168</b> | <b>3064</b> | <b>3071</b> | <b>3139</b> | <b>3139</b> | <b>3961</b> | <b>3170</b>  | <b>3304</b> | <b>3366</b> | <b>3098</b> | <b>3146</b> | <b>3209</b> | <b>3184</b> | <b>3169</b> | <b>3766</b> | <b>3081</b>   |             |
| Cow           |             | <b>75.8</b> | 2960        | 2951        | 2978        | 3018        | 3168         | 2966        | 3215        | 3296        | 3755        | 3150        | 3142        | 3071        | 3211        | 2978          |             |
| Elephant      |             |             | <b>73.7</b> | 2931        | 2876        | 2963        | 3064         | 3009        | 3070        | 2943        | 2954        | 2949        | 2924        | 3006        | 3094        | 2904          |             |
| Gerbil        |             |             |             | <b>73.9</b> | 3388        | 3424        | 3088         | 3397        | 3091        | 2936        | 2949        | 3076        | 3067        | 3010        | 3122        | 3051          |             |
| Mouse         |             |             |             |             | <b>72.4</b> | 3684        | 3071         | 3369        | 3092        | 2981        | 2962        | 3060        | 3040        | 3056        | 3113        | 3104          |             |
| Rat           |             |             |             |             |             | <b>73.4</b> | 3139         | 3420        | 3158        | 3197        | 3059        | 3124        | 3105        | 3110        | 3184        | 3141          |             |
| Orangutan     |             |             |             |             |             |             | <b>100.0</b> | 3170        | 3304        | 3366        | 3098        | 3146        | 3209        | 3184        | 3169        | 3766          | 3081        |
| Vole          |             |             |             |             |             |             |              | <b>75.8</b> | 3134        | 3140        | 2974        | 2990        | 3105        | 3084        | 3109        | 3219          | 3143        |
| Dog           |             |             |             |             |             |             |              |             | <b>80.1</b> | 3568        | 3242        | 3267        | 3233        | 3208        | 3186        | 3331          | 3136        |
| Cat           |             |             |             |             |             |             |              |             |             | <b>81.9</b> | 3249        | 3238        | 3262        | 3237        | 3198        | 3342          | 3177        |
| Pig           |             |             |             |             |             |             |              |             |             |             | <b>75.7</b> | 3246        | 3177        | 3151        | 3082        | 3139          | 3024        |
| Sheep         |             |             |             |             |             |             |              |             |             |             |             | <b>75.0</b> | 3183        | 3170        | 3088        | 3172          | 3007        |
| Donkey        |             |             |             |             |             |             |              |             |             |             |             |             | <b>76.7</b> | 3938        | 3029        | 3247          | 3080        |
| Horse         |             |             |             |             |             |             |              |             |             |             |             |             |             | <b>76.3</b> | 3011        | 3222          | 3055        |
| Rabbit        |             |             |             |             |             |             |              |             |             |             |             |             |             |             | <b>74.3</b> | 3185          | 3048        |
| Rhesus Monkey |             |             |             |             |             |             |              |             |             |             |             |             |             |             |             | <b>93.5</b>   | 3126        |
| Guinea Pig    |             |             |             |             |             |             |              |             |             |             |             |             |             |             |             |               | <b>72.2</b> |

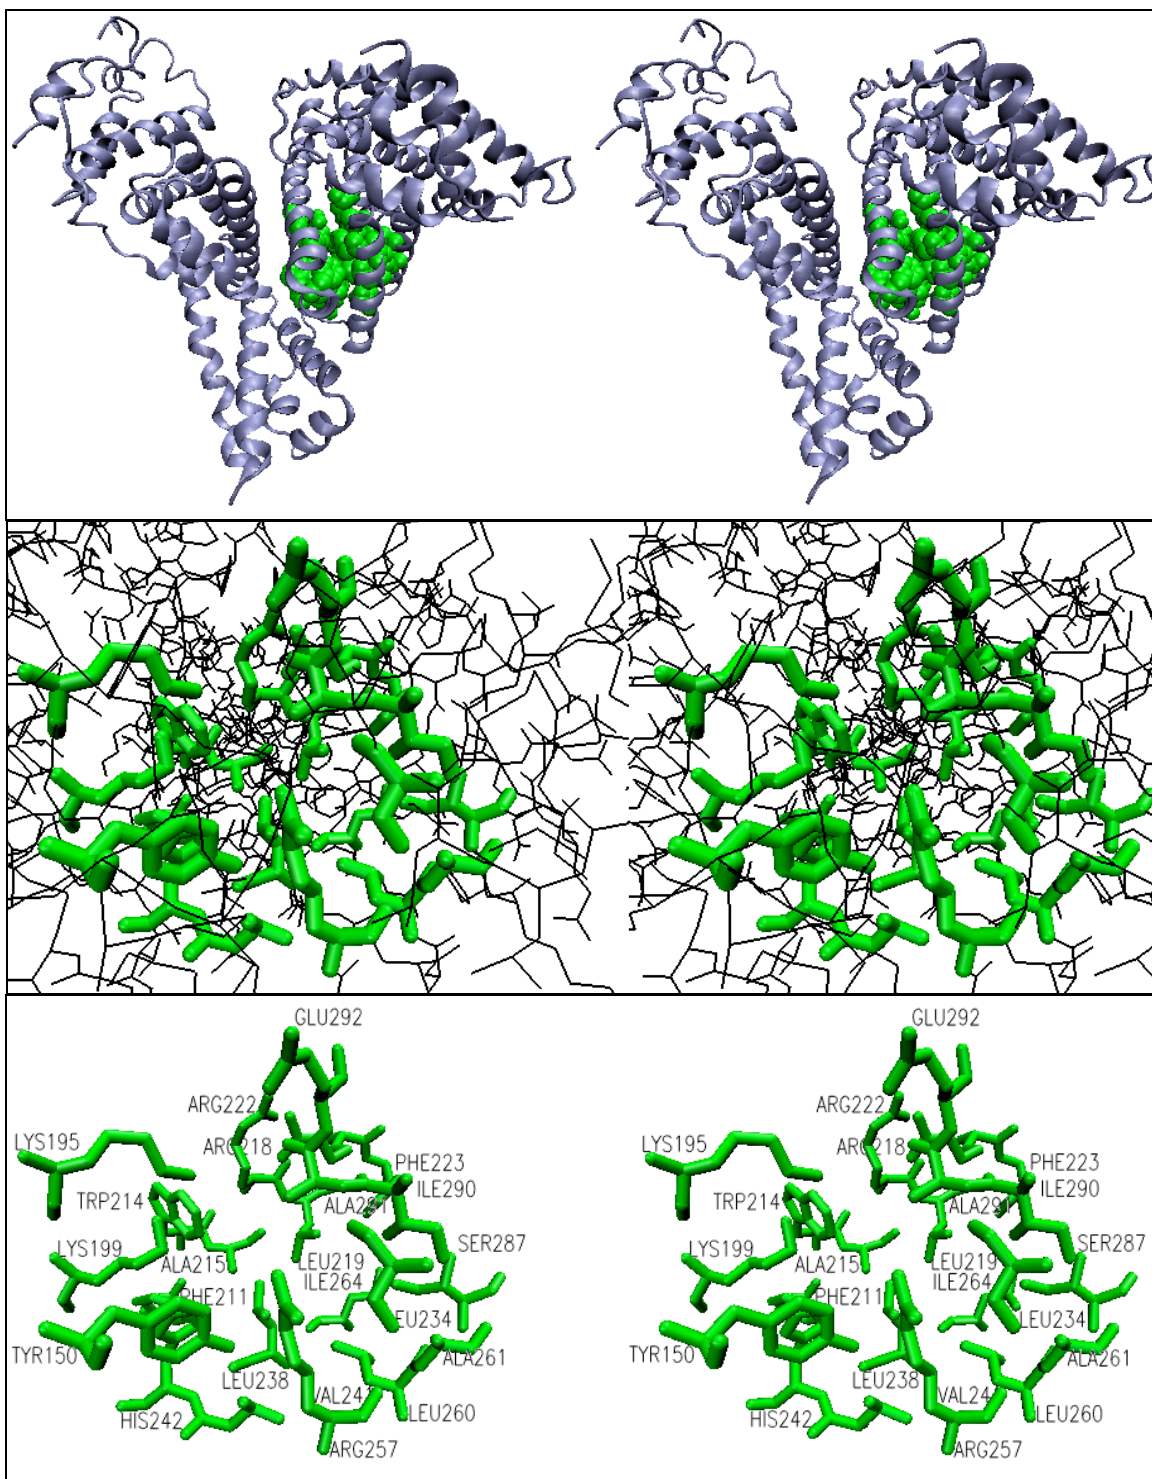

**Figure 2.** The HSA IIA Drug Binding Site. Top: Stereo view of HSA with the VDW radii of 22 amino acids lining the IIA binding site shown in green. Middle/ Bottom: Stereo views of the IIA site with individual residues indicated.

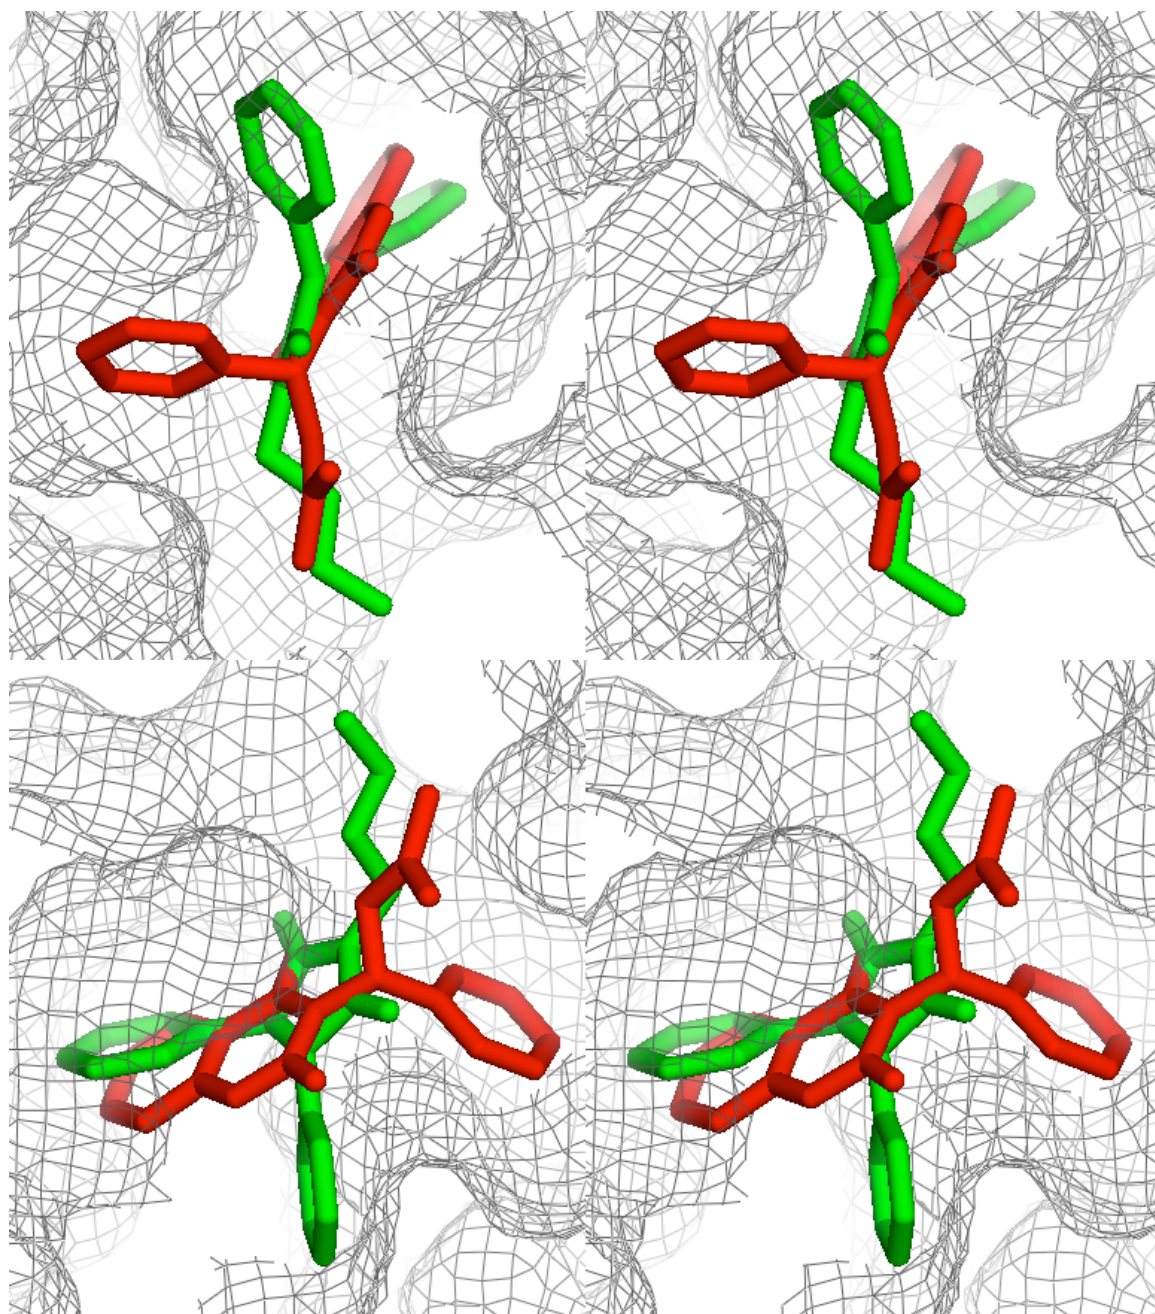

**Figure 3.** Warfarin and Phenylbutazone HSA Binding. These stereo-view overlays show warfarin (red) and phenylbutazone (green) bound in the IIA site. In the top panel, the solvent-accessible entrance is oriented down. The deepest part of the IIA site is oriented up, containing the coumarin moiety of warfarin, and one phenyl group of phenylbutazone. In the bottom panels, the entrance to the pocket is oriented up, and the orientation of the second phenylbutazone phenyl ring is clearly distinct from the warfarin phenyl group. The PDB ID#s for the HSA-warfarin and HSA-phenylbutazone adducts are *2bxd*, and *2bxc*, respectively [24].

Table 1. Species-Dependence of Amino Acid Sequence Homology in Serum Albumins

| Comparison Criteria   | Sequence Conservation vs. HSA (% Identity) |                                      |                                                 |
|-----------------------|--------------------------------------------|--------------------------------------|-------------------------------------------------|
|                       | Entire Protein <sup>a</sup>                | Within ~20Å of Site IIA <sup>b</sup> | Directly Adjacent to Drug Site IIA <sup>c</sup> |
| Rat <sup>d</sup>      | 73.4                                       | 73.8                                 | 68.2                                            |
| Sheep <sup>d</sup>    | 75.0                                       | 82.2                                 | 72.7                                            |
| Donkey <sup>d</sup>   | 76.7                                       | 85.0                                 | 81.8                                            |
| Rabbit <sup>d</sup>   | 74.3                                       | 77.7                                 | 63.6                                            |
| Cow <sup>d</sup>      | 75.8                                       | 88.8                                 | 77.3                                            |
| Pig <sup>d</sup>      | 75.7                                       | 86.0                                 | 90.9                                            |
| Dog <sup>d</sup>      | 80.1                                       | 86.9                                 | 81.8                                            |
| Mouse <sup>d</sup>    | 72.4                                       | 77.6                                 | 68.2                                            |
| Cat <sup>d</sup>      | 81.9                                       | 89.7                                 | 81.8                                            |
| Elephant <sup>d</sup> | 73.7                                       | 80.3                                 | 86.4                                            |
| Gerbil                | 73.9                                       | 74.8                                 | 72.7                                            |
| Vole                  | 75.8                                       | 75.7                                 | 72.7                                            |
| Guinea Pig            | 72.2                                       | 81.3                                 | 63.6                                            |
| Orangutan             | 100.0                                      | 100.0                                | 100.0                                           |
| Rhesus Monkey         | 93.5                                       | 95.3                                 | 86.4                                            |
| Horse                 | 76.3                                       | 84.1                                 | 81.8                                            |

<sup>a</sup>Approx. 585 total residues

<sup>b</sup>107 residues

<sup>c</sup>22 residues

<sup>d</sup> Evaluated to assess radiopharmaceutical binding in the present study using commercially available protein.

**Table 2.** Amino Acid Sequences in Selected Mammal Serum Albumins<sup>§†^</sup>

<sup>§</sup>Residues are aligned and numbered consecutively according to the HSA sequence. Unique non-human insertions are indicated in the leftmost column by (\*). Notes on gaps and insertions are included to the right of the sequences.

<sup>^</sup>For all species, the 22 amino acids corresponding to the residues that line the IIA drug binding site of HSA are shaded.

<sup>†</sup>The UniProt serum albumin identifiers are as follows: human (P02768), rat (P02770), mouse (P07724), cow (P02769), rabbit (P49065), sheep (P14639), dog (P49822), pig (A2THZ2), donkey (Q5XLE4), elephant (Q6B3Z0), cat, (P49064), gerbil (O35090), vole (Q5EG49), guinea pig (Q6WDN9), orangutan (Q5NVH5), monkey (Q28522), and horse (P35747).

| No. | Human | Rat | Mouse | Cow | Rabbit | Sheep | Dog | Pig | Donkey | Elephant | Cat | Gerbil | Vole | Guinea Pig | Orangutan | Monkey | Horse |
|-----|-------|-----|-------|-----|--------|-------|-----|-----|--------|----------|-----|--------|------|------------|-----------|--------|-------|
| -23 | M     | M   | M     | M   | M      | M     | M   | M   | M      |          | M   | M      | M    | M          | M         |        | M     |
| -22 | K     | K   | K     | K   | K      | K     | K   | K   | K      |          | K   | K      | K    | K          | K         |        | K     |
| -21 | W     | W   | W     | W   | W      | W     | W   | W   | W      |          | W   | W      | W    | W          | W         |        | W     |
| -20 | V     | V   | V     | V   | V      | V     | V   | V   | V      |          | V   | V      | V    | V          | V         |        | V     |
| -19 | T     | T   | T     | T   | T      | T     | T   | T   | T      |          | T   | T      | T    | T          | T         |        | T     |
| -18 | F     | F   | F     | F   | F      | F     | F   | F   | F      |          | F   | F      | F    | F          | F         |        | F     |
| -17 | I     | L   | L     | I   | I      | I     | I   | I   | V      |          | I   | L      | L    | I          | I         |        | V     |
| -16 | S     | L   | L     | S   | S      | S     | S   | S   | S      |          | S   | L      | L    | S          | S         |        | S     |
| -15 | L     | L   | L     | L   | L      | L     | L   | L   | L      |          | L   | L      | L    | L          | L         | L      | L     |
| -14 | L     | L   | L     | L   | L      | L     | F   | L   | L      |          | L   | L      | L    | L          | L         | L      | L     |
| -13 | F     | F   | F     | L   | F      | L     | F   | F   | F      |          | L   | F      | F    | F          | F         | F      | F     |
| -12 | L     | I   | V     | L   | L      | L     | L   | L   | L      |          | L   | V      | V    | L          | L         | L      | L     |
| -11 | F     | S   | S     | F   | F      | F     | F   | F   | F      |          | F   | S      | S    | F          | F         | F      | F     |
| -10 | S     | G   | G     | S   | S      | S     | S   | S   | S      |          | S   | G      | G    | S          | S         | S      | S     |
| -9  | S     | S   | S     | S   | S      | S     | S   | S   | S      |          | S   | S      | S    | S          | S         | S      | S     |
| -8  | A     | A   | A     | A   | A      | A     | A   | A   | A      |          | A   | A      | A    | V          | A         | A      | A     |
| -7  | Y     | F   | F     | Y   | Y      | Y     | Y   | Y   | Y      |          | Y   | F      | F    | Y          | Y         | Y      | Y     |
| -6  | S     | S   | S     | S   | S      | S     | S   | S   | F      |          | S   | S      | S    | S          | S         | S      | S     |
| -5  | R     | R   | R     | R   | R      | R     | R   | R   | R      |          | R   | R      | R    | R          | R         | R      | R     |
| -4  | G     | G   | G     | G   | G      | G     | G   | G   | G      |          | G   | G      | G    | G          | G         | G      | G     |
| -3  | V     | V   | V     | V   | V      | V     | L   | V   | V      |          | V   | V      | L    | V          | V         | V      | V     |
| -2  | F     | F   | F     | F   | F      | F     | V   | F   | L      |          | T   | F      | F    | F          | F         | F      | L     |
| -1  | R     | R   | R     | R   | R      | R     | R   | R   | R      |          | R   | R      | R    | R          | R         | R      | R     |
| 0   | R     | R   | R     | R   | R      | R     | R   | R   | R      |          | R   | R      | R    | R          | R         | R      | R     |
| 1   | D     | E   | E     | D   | E      | D     | E   | D   | D      |          | E   | D      | D    | E          | D         | D      | D     |
| 2   | A     | A   | A     | T   | A      | T     | A   | T   | T      |          | A   | A      | A    | A          | A         | T      | T     |
| *   | --    | --  | --    | --  | --     | --    | --  | --  | --     | --       | A   | --     | --   | --         | --        | --     | --    |
| 3   | H     | H   | H     | H   | H      | H     | Y   | Y   | H      | Y        | H   | H      | H    | H          | H         | H      | H     |
| 4   | K     | K   | K     | K   | K      | K     | K   | K   | K      | K        | Q   | K      | K    | K          | K         | K      | K     |
| 5   | S     | S   | S     | S   | S      | S     | S   | S   | S      | S        | S   | S      | S    | S          | S         | S      | S     |
| 6   | E     | E   | E     | E   | E      | E     | E   | E   | E      | E        | E   | E      | E    | E          | E         | E      | E     |
| 7   | V     | I   | I     | I   | I      | I     | I   | I   | I      | I        | I   | I      | I    | I          | V         | V      | I     |
| 8   | A     | A   | A     | A   | A      | A     | A   | A   | A      | A        | A   | A      | A    | A          | A         | A      | A     |
| 9   | H     | H   | H     | H   | H      | H     | H   | H   | H      | H        | H   | H      | H    | H          | H         | H      | H     |
| 10  | R     | R   | R     | R   | R      | R     | R   | R   | R      | R        | R   | R      | R    | R          | R         | R      | R     |
| 11  | F     | F   | Y     | F   | F      | F     | Y   | F   | F      | Y        | F   | Y      | Y    | F          | F         | F      | F     |
| 12  | K     | K   | N     | K   | N      | N     | N   | K   | N      | K        | N   | K      | N    | N          | K         | K      | N     |
| 13  | D     | D   | D     | D   | D      | D     | D   | D   | D      | D        | D   | D      | D    | D          | D         | D      | D     |
| 14  | L     | L   | L     | L   | V      | L     | L   | L   | L      | L        | L   | L      | L    | L          | L         | L      | L     |
| 15  | G     | G   | G     | G   | G      | G     | G   | G   | G      | G        | G   | G      | G    | G          | G         | G      | G     |
| 16  | E     | E   | E     | E   | E      | E     | E   | E   | E      | E        | E   | E      | E    | E          | E         | E      | E     |

Precursor Residues

N-Terminus

Gerbil insertion

| No. | Human | Rat | Mouse | Cow | Rabbit | Sheep | Dog | Pig | Donkey | Elephant | Cat | Gerbil | Vole | Guinea Pig | Orangutan | Monkey | Horse |
|-----|-------|-----|-------|-----|--------|-------|-----|-----|--------|----------|-----|--------|------|------------|-----------|--------|-------|
| 17  | E     | Q   | Q     | E   | E      | E     | E   | Q   | K      | D        | E   | K      | K    | G          | E         | E      | K     |
| 18  | N     | H   | H     | H   | H      | N     | H   | Y   | H      | L        | H   | Y      | Y    | H          | N         | H      | H     |
| 19  | F     | F   | F     | F   | F      | F     | F   | F   | F      | F        | F   | F      | F    | F          | F         | F      | F     |
| 20  | K     | K   | K     | K   | I      | Q     | R   | E   | K      | K        | R   | K      | K    | K          | K         | K      | K     |
| 21  | A     | G   | G     | G   | G      | G     | G   | G   | G      | G        | G   | G      | G    | G          | A         | G      | G     |
| 22  | L     | L   | L     | L   | L      | L     | L   | L   | L      | L        | L   | L      | L    | L          | L         | L      | L     |
| 23  | V     | V   | V     | V   | V      | V     | V   | V   | V      | L        | V   | V      | V    | V          | V         | V      | V     |
| 24  | L     | L   | L     | L   | L      | L     | L   | L   | L      | L        | L   | L      | L    | L          | L         | L      | L     |
| 25  | I     | I   | I     | I   | I      | I     | V   | I   | V      | I        | V   | Y      | I    | I          | I         | V      | V     |
| 26  | A     | A   | A     | A   | T      | A     | A   | A   | A      | S        | A   | T      | T    | T          | A         | A      | A     |
| 27  | F     | F   | F     | F   | F      | F     | F   | F   | F      | F        | F   | F      | F    | L          | F         | F      | F     |
| 28  | A     | S   | S     | S   | S      | S     | S   | S   | S      | A        | S   | S      | A    | S          | A         | S      | S     |
| 29  | Q     | Q   | Q     | Q   | Q      | Q     | Q   | Q   | Q      | Q        | Q   | Q      | Q    | Q          | Q         | Q      | Q     |
| 30  | Y     | Y   | Y     | Y   | Y      | Y     | Y   | H   | Y      | Y        | Y   | Y      | H    | H          | Y         | Y      | Y     |
| 31  | L     | L   | L     | L   | L      | L     | L   | L   | L      | L        | L   | L      | L    | L          | L         | L      | L     |
| 32  | Q     | Q   | Q     | Q   | Q      | Q     | Q   | Q   | Q      | Q        | Q   | Q      | Q    | Q          | Q         | Q      | Q     |
| 33  | Q     | K   | K     | Q   | K      | Q     | Q   | Q   | Q      | K        | Q   | K      | K    | K          | Q         | Q      | Q     |
| 34  | C     | C   | C     | C   | C      | C     | C   | C   | C      | S        | C   | C      | C    | S          | C         | C      | C     |
| 35  | P     | P   | S     | P   | P      | P     | P   | P   | P      | P        | P   | S      | P    | P          | P         | P      | P     |
| 36  | F     | Y   | Y     | F   | Y      | F     | F   | Y   | F      | Y        | F   | Y      | Y    | F          | F         | F      | F     |
| 37  | E     | E   | D     | D   | E      | D     | E   | E   | E      | D        | E   | E      | E    | E          | E         | E      | E     |
| 38  | D     | E   | E     | E   | E      | E     | D   | E   | D      | E        | D   | E      | E    | E          | D         | E      | D     |
| 39  | H     | H   | H     | H   | H      | H     | H   | H   | H      | H        | H   | H      | H    | H          | H         | H      | H     |
| 40  | V     | I   | A     | V   | A      | V     | V   | V   | V      | V        | V   | V      | I    | V          | V         | V      | V     |
| 41  | K     | K   | K     | K   | K      | K     | K   | K   | K      | Q        | K   | K      | K    | K          | K         | K      | K     |
| 42  | L     | L   | L     | L   | L      | L     | L   | L   | L      | S        | L   | L      | L    | L          | L         | L      | L     |
| 43  | V     | V   | V     | V   | V      | V     | A   | V   | V      | V        | V   | V      | V    | V          | V         | V      | V     |
| 44  | N     | Q   | Q     | N   | K      | K     | K   | R   | N      | T        | N   | R      | N    | N          | N         | N      | N     |
| 45  | E     | E   | E     | E   | E      | E     | E   | E   | E      | A        | E   | E      | E    | E          | E         | E      | E     |
| 46  | V     | V   | V     | L   | V      | L     | V   | V   | V      | V        | V   | V      | V    | V          | V         | V      | V     |
| 47  | T     | T   | T     | T   | T      | T     | T   | T   | T      | T        | T   | T      | T    | T          | T         | T      | T     |
| 48  | E     | D   | D     | E   | D      | E     | E   | E   | E      | D        | E   | D      | D    | D          | E         | E      | E     |
| 49  | F     | F   | F     | F   | L      | F     | F   | F   | F      | L        | F   | F      | F    | F          | F         | F      | F     |
| 50  | A     | A   | A     | A   | A      | A     | A   | A   | A      | A        | A   | A      | A    | A          | A         | A      | A     |
| 51  | K     | K   | K     | K   | K      | K     | K   | K   | K      | K        | S   | K      | K    | K          | K         | K      | K     |
| 52  | T     | T   | T     | T   | A      | T     | A   | T   | K      | T        | G   | N      | A    | A          | T         | T      | K     |
| 53  | C     | C   | C     | C   | C      | C     | C   | C   | C      | C        | C   | C      | C    | C          | C         | C      | C     |
| 54  | V     | V   | V     | V   | V      | V     | A   | V   | A      | A        | V   | A      | A    | V          | V         | V      | A     |
| 55  | A     | A   | A     | A   | A      | A     | A   | A   | A      | A        | A   | K      | A    | A          | A         | A      | A     |
| 56  | D     | D   | D     | D   | D      | D     | E   | D   | D      | D        | D   | D      | D    | D          | D         | D      | D     |
| 57  | E     | E   | E     | E   | E      | E     | E   | E   | E      | E        | Q   | E      | E    | E          | E         | E      | E     |



| No. | Human | Rat | Mouse | Cow | Rabbit | Sheep | Dog | Pig | Donkey | Elephant | Cat | Gerbil | Vole | Guinea Pig | Orangutan | Monkey | Horse |
|-----|-------|-----|-------|-----|--------|-------|-----|-----|--------|----------|-----|--------|------|------------|-----------|--------|-------|
| 58  | S     | N   | S     | S   | S      | S     | S   | S   | S      | S        | S   | S      | S    | S          | S         | S      | S     |
| 59  | A     | A   | A     | H   | A      | H     | G   | A   | A      | A        | A   | A      | A    | A          | A         | A      | A     |
| 60  | E     | E   | A     | A   | A      | A     | A   | E   | E      | E        | A   | E      | E    | Q          | E         | E      | E     |
| 61  | N     | N   | N     | G   | N      | G     | N   | N   | N      | H        | N   | N      | N    | N          | N         | N      | N     |
| 62  | C     | C   | C     | C   | C      | C     | C   | C   | C      | C        | C   | C      | C    | C          | C         | C      | C     |
| 63  | D     | D   | D     | E   | D      | D     | D   | D   | D      | G        | E   | D      | D    | G          | D         | D      | D     |
| 64  | K     | K   | K     | K   | K      | K     | K   | K   | K      | D        | K   | K      | K    | K          | K         | K      | K     |
| 65  | S     | S   | S     | S   | S      | S     | S   | S   | S      | S        | S   | S      | S    | A          | S         | S      | S     |
| 66  | L     | I   | L     | L   | L      | L     | L   | I   | L      | L        | L   | L      | L    | I          | L         | L      | L     |
| 67  | H     | H   | H     | H   | H      | H     | H   | H   | H      | H        | H   | H      | H    | A          | H         | H      | H     |
| 68  | T     | T   | T     | T   | D      | T     | T   | T   | T      | T        | E   | T      | T    | T          | T         | T      | T     |
| 69  | L     | L   | L     | L   | I      | L     | L   | L   | L      | I        | L   | L      | L    | L          | L         | L      | L     |
| 70  | F     | F   | F     | F   | F      | F     | F   | F   | F      | F        | L   | F      | F    | F          | F         | F      | F     |
| 71  | G     | G   | G     | G   | G      | G     | G   | G   | G      | G        | G   | G      | G    | G          | G         | G      | G     |
| 72  | D     | D   | D     | D   | D      | D     | D   | D   | D      | D        | D   | D      | D    | D          | D         | D      | D     |
| 73  | K     | K   | K     | E   | K      | E     | K   | K   | K      | K        | K   | K      | K    | K          | K         | K      | K     |
| 74  | L     | L   | L     | L   | I      | L     | L   | L   | L      | L        | L   | L      | L    | V          | L         | L      | L     |
| 75  | C     | C   | C     | C   | C      | C     | C   | C   | C      | C        | C   | C      | C    | C          | C         | C      | C     |
| 76  | T     | A   | A     | K   | A      | K     | T   | A   | T      | A        | T   | S      | A    | A          | T         | T      | T     |
| *   | --    | --  | --    | --  | --     | --    | --  | --  | --     | R        | --  | --     | --   | --         | --        | --     | --    |
| 77  | V     | I   | I     | V   | L      | V     | V   | I   | V      | V        | V   | L      | I    | I          | V         | V      | V     |
| 78  | A     | P   | P     | A   | P      | A     | A   | P   | A      | T        | A   | P      | P    | P          | A         | A      | A     |
| 79  | T     | K   | N     | S   | S      | T     | S   | S   | T      | A        | S   | N      | N    | S          | T         | T      | T     |
| 80  | L     | L   | L     | L   | L      | L     | L   | L   | L      | H        | L   | F      | L    | L          | L         | L      | L     |
| 81  | R     | R   | R     | R   | R      | R     | R   | R   | R      | Q        | R   | G      | G    | R          | R         | R      | R     |
| 82  | E     | D   | E     | E   | D      | E     | D   | G   | A      | D        | D   | E      | D    | E          | E         | E      | A     |
| 83  | T     | N   | N     | T   | T      | T     | K   | H   | T      | T        | K   | K      | N    | T          | T         | T      | T     |
| 84  | Y     | Y   | Y     | Y   | Y      | Y     | Y   | Y   | Y      | Y        | Y   | Y      | Y    | Y          | Y         | Y      | Y     |
| 85  | G     | G   | G     | G   | G      | G     | G   | G   | G      | G        | G   | A      | A    | G          | G         | G      | G     |
| 86  | E     | E   | E     | D   | D      | D     | D   | D   | E      | E        | E   | E      | E    | E          | E         | E      | E     |
| 87  | M     | L   | L     | M   | V      | M     | M   | L   | L      | F        | M   | M      | M    | L          | M         | M      | L     |
| 88  | A     | A   | A     | A   | A      | A     | A   | A   | A      | A        | A   | A      | A    | A          | A         | A      | A     |
| 89  | D     | D   | D     | D   | D      | D     | D   | D   | D      | E        | D   | D      | E    | D          | D         | D      | D     |
| 90  | C     | C   | C     | C   | C      | C     | C   | C   | C      | C        | C   | C      | C    | C          | C         | C      | C     |
| 91  | C     | C   | C     | C   | C      | C     | C   | C   | C      | C        | C   | C      | C    | C          | C         | C      | C     |
| 92  | A     | A   | T     | E   | E      | E     | E   | E   | E      | G        | E   | A      | A    | A          | A         | A      | E     |
| 93  | K     | K   | K     | K   | K      | K     | K   | K   | K      | K        | K   | K      | K    | K          | K         | K      | K     |
| 94  | Q     | Q   | Q     | Q   | K      | Q     | Q   | E   | Q      | Q        | K   | Q      | Q    | E          | Q         | Q      | Q     |
| 95  | E     | E   | E     | E   | E      | E     | E   | E   | E      | E        | E   | E      | E    | D          | E         | E      | E     |
| 96  | P     | P   | P     | P   | P      | P     | P   | P   | P      | P        | P   | P      | P    | P          | P         | P      | P     |
| 97  | E     | E   | E     | E   | E      | E     | D   | E   | E      | E        | E   | E      | E    | D          | E         | E      | E     |

Elephant  
insertion

| No. | Human | Rat | Mouse | Cow | Rabbit | Sheep | Dog | Pig | Donkey | Elephant | Cat | Gerbil | Vole | Guinea Pig | Orangutan | Monkey | Horse |
|-----|-------|-----|-------|-----|--------|-------|-----|-----|--------|----------|-----|--------|------|------------|-----------|--------|-------|
| 98  | R     | R   | R     | R   | R      | R     | R   | R   | R      | R        | R   | R      | R    | R          | R         | R      | R     |
| 99  | N     | N   | N     | N   | N      | N     | N   | N   | N      | N        | N   | N      | N    | V          | N         | N      | N     |
| 100 | E     | E   | E     | E   | E      | E     | E   | E   | E      | E        | E   | E      | Q    | E          | E         | E      | E     |
| 101 | C     | C   | C     | C   | C      | C     | C   | C   | C      | C        | C   | C      | C    | C          | C         | C      | C     |
| 102 | F     | F   | F     | F   | F      | F     | F   | F   | F      | F        | F   | F      | F    | F          | F         | F      | F     |
| 103 | L     | L   | L     | L   | L      | L     | L   | L   | L      | L        | L   | L      | L    | L          | L         | L      | L     |
| 104 | Q     | Q   | Q     | S   | H      | N     | A   | Q   | T      | K        | Q   | Q      | K    | Q          | Q         | Q      | T     |
| 105 | H     | H   | H     | H   | H      | H     | H   | H   | H      | H        | H   | H      | H    | H          | H         | H      | H     |
| 106 | K     | K   | K     | K   | K      | K     | K   | K   | K      | K        | K   | K      | K    | K          | K         | K      | K     |
| 107 | D     | D   | D     | D   | D      | D     | D   | N   | D      | D        | D   | D      | D    | D          | D         | D      | D     |
| 108 | D     | D   | D     | D   | D      | D     | D   | D   | D      | D        | D   | D      | D    | D          | D         | D      | D     |
| 109 | N     | N   | N     | S   | K      | S     | N   | N   | H      | N        | N   | N      | K    | N          | N         | N      | H     |
| 110 | P     | P   | P     | P   | P      | P     | P   | P   | P      | P        | P   | P      | P    | P          | P         | P      | P     |
| 111 | N     | N   | S     | D   | D      | D     | G   | D   | N      | A        | G   | Q      | S    | N          | N         | N      | N     |
| 112 | L     | L   | L     | L   | L      | L     | F   | I   | L      | L        | F   | L      | L    | L          | L         | L      | L     |
| 113 | P     | P   | P     | P   | P      | P     | P   | P   | P      | P        | G   | P      | P    | P          | P         | P      | P     |
| 114 | R     | P   | P     | K   | P      | K     | P   | K   | K      | P        | Q   | P      | P    | P          | R         | P      | K     |
| 115 | L     | F   | F     | L   | F      | L     | L   | L   | L      | L        | L   | F      | F    | F          | L         | L      | L     |
| 116 | V     | Q   | E     | K   | A      | K     | V   | K   | K      | V        | V   | K      | V    | E          | V         | V      | K     |
| 117 | R     | R   | R     | --  | R      | --    | A   | --  | --     | R        | T   | R      | R    | R          | R         | R      | --    |
| 118 | P     | P   | P     | P   | P      | P     | P   | P   | P      | P        | P   | A      | P    | P          | P         | P      | P     |
| 119 | E     | E   | E     | D   | E      | E     | E   | D   | E      | P        | E   | E      | E    | E          | E         | E      | E     |
| 120 | V     | A   | A     | P   | A      | P     | P   | P   | P      | A        | A   | P      | A    | P          | V         | V      | P     |
| 121 | D     | E   | E     | N   | D      | D     | D   | V   | D      | D        | D   | D      | E    | E          | D         | D      | D     |
| 122 | V     | A   | A     | T   | V      | T     | A   | A   | A      | A        | A   | A      | V    | A          | V         | V      | A     |
| 123 | M     | M   | M     | L   | L      | L     | L   | L   | Q      | L        | M   | M      | M    | L          | M         | M      | Q     |
| 124 | C     | C   | C     | C   | C      | C     | C   | C   | C      | C        | C   | C      | C    | C          | C         | C      | C     |
| 125 | T     | T   | T     | D   | K      | A     | A   | A   | A      | A        | T   | T      | T    | T          | T         | T      | A     |
| 126 | A     | S   | S     | E   | A      | E     | A   | D   | A      | S        | A   | A      | S    | A          | A         | A      | A     |
| 127 | F     | F   | F     | F   | F      | F     | F   | F   | F      | F        | F   | F      | F    | F          | F         | F      | F     |
| 128 | H     | Q   | K     | K   | H      | K     | Q   | Q   | Q      | E        | H   | Q      | Q    | K          | H         | H      | Q     |
| 129 | D     | E   | E     | A   | D      | A     | D   | E   | E      | E        | E   | E      | E    | E          | D         | D      | E     |
| 130 | N     | N   | N     | D   | D      | D     | N   | D   | D      | N        | N   | N      | N    | N          | N         | N      | D     |
| 131 | E     | P   | P     | E   | E      | E     | E   | E   | P      | E        | E   | A      | P    | N          | E         | E      | P     |
| 132 | E     | T   | T     | K   | K      | K     | Q   | Q   | D      | R        | Q   | E      | A    | D          | E         | A      | D     |
| 133 | T     | S   | T     | K   | A      | K     | L   | K   | K      | K        | R   | A      | S    | R          | T         | T      | K     |
| 134 | F     | F   | F     | F   | F      | F     | F   | F   | F      | F        | F   | F      | F    | F          | F         | F      | F     |
| 135 | L     | L   | M     | W   | F      | W     | L   | W   | L      | F        | L   | M      | M    | I          | L         | L      | L     |
| 136 | K     | G   | G     | G   | G      | G     | G   | G   | G      | G        | G   | G      | G    | G          | K         | K      | G     |
| 137 | K     | H   | H     | K   | H      | K     | K   | K   | K      | V        | K   | H      | H    | H          | K         | K      | K     |
| 138 | Y     | Y   | Y     | Y   | Y      | Y     | Y   | Y   | Y      | Y        | Y   | Y      | Y    | Y          | Y         | Y      | Y     |

Hooved  
animal  
gaps

| No. | Human | Rat | Mouse | Cow | Rabbit | Sheep | Dog | Pig | Donkey | Elephant | Cat | Gerbil | Vole | Guinea Pig | Orangutan | Monkey | Horse |
|-----|-------|-----|-------|-----|--------|-------|-----|-----|--------|----------|-----|--------|------|------------|-----------|--------|-------|
| 139 | L     | L   | L     | L   | L      | L     | L   | L   | L      | L        | L   | L      | L    | L          | L         | L      | L     |
| 140 | Y     | H   | H     | Y   | Y      | Y     | Y   | Y   | Y      | Y        | Y   | H      | H    | Y          | Y         | Y      | Y     |
| 141 | E     | E   | E     | E   | E      | E     | E   | E   | E      | E        | E   | E      | A    | E          | E         | E      | E     |
| 142 | I     | V   | V     | I   | V      | V     | I   | I   | V      | V        | I   | V      | V    | V          | I         | V      | V     |
| 143 | A     | A   | A     | A   | A      | A     | A   | A   | A      | A        | A   | A      | A    | S          | A         | A      | A     |
| 144 | R     | R   | R     | R   | R      | R     | R   | R   | R      | R        | R   | R      | R    | R          | R         | R      | R     |
| 145 | R     | R   | R     | R   | R      | R     | R   | R   | R      | R        | R   | R      | R    | R          | R         | R      | R     |
| 146 | H     | H   | H     | H   | H      | H     | H   | H   | H      | H        | H   | H      | H    | H          | H         | H      | H     |
| 147 | P     | P   | P     | P   | P      | P     | P   | P   | P      | P        | P   | P      | P    | P          | P         | P      | P     |
| 148 | Y     | Y   | Y     | Y   | Y      | Y     | Y   | Y   | Y      | Y        | Y   | Y      | Y    | Y          | Y         | Y      | Y     |
| 149 | F     | F   | F     | F   | F      | F     | F   | F   | F      | F        | F   | F      | F    | F          | F         | F      | F     |
| 150 | Y     | Y   | Y     | Y   | Y      | Y     | Y   | Y   | Y      | Y        | Y   | Y      | Y    | Y          | Y         | Y      | Y     |
| 151 | A     | A   | A     | A   | A      | A     | A   | A   | G      | A        | A   | G      | A    | A          | A         | A      | G     |
| 152 | P     | P   | P     | P   | P      | P     | P   | P   | P      | P        | P   | P      | P    | P          | P         | P      | P     |
| 153 | E     | E   | E     | E   | E      | E     | E   | E   | E      | E        | E   | E      | E    | E          | E         | E      | E     |
| 154 | L     | L   | L     | L   | L      | L     | L   | L   | L      | L        | L   | L      | L    | L          | L         | L      | L     |
| 155 | L     | L   | L     | L   | L      | L     | L   | L   | L      | I        | L   | L      | L    | L          | L         | L      | L     |
| 156 | F     | Y   | Y     | Y   | Y      | Y     | Y   | Y   | F      | Y        | Y   | Y      | Y    | Y          | F         | F      | F     |
| 157 | F     | Y   | Y     | Y   | Y      | Y     | Y   | Y   | H      | Y        | Y   | L      | Y    | Y          | F         | F      | H     |
| 158 | A     | A   | A     | A   | A      | A     | A   | A   | A      | S        | A   | A      | A    | A          | A         | A      | A     |
| 159 | K     | E   | E     | N   | Q      | N     | Q   | I   | E      | E        | E   | D      | E    | E          | K         | A      | E     |
| 160 | R     | K   | Q     | K   | K      | K     | Q   | I   | E      | K        | E   | K      | K    | K          | R         | R      | E     |
| 161 | Y     | Y   | Y     | Y   | Y      | Y     | Y   | Y   | Y      | Y        | Y   | Y      | Q    | Y          | Y         | Y      | Y     |
| 162 | K     | N   | N     | N   | K      | N     | K   | K   | K      | K        | K   | T      | S    | K          | K         | K      | K     |
| 163 | A     | E   | E     | G   | A      | G     | G   | D   | A      | D        | G   | A      | A    | N          | A         | A      | A     |
| 164 | A     | V   | I     | V   | I      | V     | V   | V   | D      | I        | V   | V      | I    | A          | A         | A      | D     |
| 165 | F     | L   | L     | F   | L      | F     | F   | F   | F      | L        | F   | L      | M    | L          | F         | F      | F     |
| 166 | T     | T   | T     | Q   | T      | Q     | A   | S   | T      | T        | T   | T      | T    | T          | T         | A      | T     |
| 167 | E     | Q   | Q     | E   | E      | E     | E   | E   | E      | E        | E   | E      | E    | E          | E         | E      | E     |
| 168 | C     | C   | C     | C   | C      | C     | C   | C   | C      | C        | C   | C      | C    | C          | C         | C      | C     |
| 169 | C     | C   | C     | C   | C      | C     | C   | C   | C      | C        | C   | C      | C    | C          | C         | C      | C     |
| 170 | Q     | T   | A     | Q   | E      | Q     | Q   | Q   | P      | H        | E   | A      | A    | E          | Q         | Q      | P     |
| 171 | A     | E   | E     | A   | A      | A     | A   | A   | A      | A        | A   | A      | E    | A          | A         | A      | A     |
| 172 | A     | S   | A     | E   | A      | E     | A   | A   | D      | D        | A   | D      | A    | A          | A         | A      | D     |
| 173 | D     | D   | D     | D   | D      | D     | D   | D   | D      | D        | D   | D      | D    | D          | D         | D      | D     |
| 174 | K     | K   | K     | K   | K      | K     | K   | K   | K      | K        | K   | K      | K    | K          | K         | K      | K     |
| 175 | A     | A   | E     | G   | G      | G     | A   | A   | A      | A        | A   | G      | A    | A          | A         | A      | L     |
| 176 | A     | A   | S     | A   | A      | A     | A   | A   | G      | A        | A   | A      | A    | A          | A         | A      | A     |
| 177 | C     | C   | C     | C   | C      | C     | C   | C   | C      | C        | C   | C      | C    | C          | C         | C      | C     |
| 178 | L     | L   | L     | L   | L      | L     | L   | L   | L      | L        | L   | L      | L    | L          | L         | L      | L     |
| 179 | L     | T   | T     | L   | T      | L     | G   | L   | I      | K        | T   | T      | G    | T          | L         | L      | I     |

| No. | Human | Rat | Mouse | Cow | Rabbit | Sheep | Dog | Pig | Donkey | Elephant | Cat | Gerbil | Vole | Guinea Pig | Orangutan | Monkey | Horse |
|-----|-------|-----|-------|-----|--------|-------|-----|-----|--------|----------|-----|--------|------|------------|-----------|--------|-------|
| 180 | P     | P   | P     | P   | P      | P     | P   | P   | P      | P        | P   | P      | P    | P          | P         | P      | P     |
| 181 | K     | K   | K     | K   | K      | K     | K   | K   | K      | K        | K   | K      | K    | K          | K         | K      | K     |
| 182 | L     | L   | L     | I   | L      | I     | I   | I   | L      | I        | V   | L      | L    | L          | L         | L      | L     |
| 183 | D     | D   | D     | E   | D      | D     | E   | E   | D      | D        | D   | D      | D    | D          | D         | D      | D     |
| 184 | E     | A   | G     | T   | A      | A     | A   | H   | A      | A        | A   | A      | A    | A          | E         | E      | A     |
| 185 | L     | V   | V     | M   | L      | M     | L   | L   | L      | L        | L   | L      | L    | I          | L         | L      | L     |
| 186 | R     | K   | K     | R   | E      | R     | R   | R   | K      | K        | R   | K      | K    | K          | R         | R      | K     |
| 187 | D     | E   | E     | E   | G      | E     | E   | E   | E      | D        | E   | E      | E    | E          | D         | D      | E     |
| 188 | E     | K   | K     | K   | K      | K     | K   | K   | R      | T        | K   | K      | K    | K          | E         | E      | R     |
| 189 | G     | A   | A     | V   | S      | V     | V   | V   | I      | V        | V   | A      | A    | A          | G         | G      | I     |
| 190 | K     | L   | L     | L   | L      | L     | L   | L   | L      | L        | L   | L      | L    | L          | K         | K      | L     |
| 191 | A     | V   | V     | A   | I      | A     | L   | T   | L      | A        | A   | V      | L    | V          | A         | A      | L     |
| 192 | S     | A   | S     | S   | S      | S     | S   | S   | S      | S        | S   | S      | S    | S          | S         | S      | S     |
| 193 | S     | A   | S     | S   | A      | S     | S   | A   | S      | A        | S   | A      | S    | S          | S         | S      | S     |
| 194 | A     | V   | V     | A   | A      | A     | A   | A   | A      | A        | A   | V      | V    | A          | A         | A      | A     |
| 195 | K     | R   | R     | R   | Q      | R     | K   | K   | K      | R        | K   | R      | K    | Q          | K         | K      | K     |
| 196 | Q     | Q   | Q     | Q   | E      | Q     | E   | Q   | E      | Q        | E   | Q      | Q    | Q          | Q         | Q      | E     |
| 197 | R     | R   | R     | R   | R      | R     | R   | R   | R      | R        | R   | R      | R    | R          | R         | R      | R     |
| 198 | L     | M   | M     | L   | L      | L     | F   | L   | L      | L        | L   | L      | L    | L          | L         | L      | L     |
| 199 | K     | K   | K     | R   | R      | R     | K   | K   | K      | K        | K   | K      | K    | K          | K         | K      | K     |
| 200 | C     | C   | C     | C   | C      | C     | C   | C   | C      | C        | C   | C      | C    | C          | C         | C      | C     |
| 201 | A     | S   | S     | A   | A      | A     | A   | A   | S      | A        | A   | S      | S    | A          | A         | A      | S     |
| 202 | S     | S   | S     | S   | S      | S     | S   | S   | S      | N        | S   | S      | S    | S          | S         | S      | S     |
| 203 | L     | M   | M     | I   | I      | I     | L   | I   | F      | I        | L   | M      | L    | L          | L         | L      | F     |
| 204 | Q     | Q   | Q     | Q   | Q      | Q     | Q   | Q   | Q      | H        | Q   | K      | E    | Q          | Q         | Q      | Q     |
| 205 | K     | R   | K     | K   | K      | K     | K   | K   | K      | K        | K   | K      | K    | K          | K         | K      | N     |
| 206 | F     | F   | F     | F   | F      | F     | F   | F   | F      | F        | F   | F      | F    | F          | F         | F      | F     |
| 207 | G     | G   | G     | G   | G      | G     | G   | G   | G      | G        | G   | G      | G    | G          | G         | G      | G     |
| 208 | E     | E   | E     | E   | D      | E     | D   | E   | E      | E        | E   | E      | E    | E          | E         | D      | E     |
| 209 | R     | R   | R     | R   | R      | R     | R   | R   | R      | R        | R   | R      | R    | R          | R         | R      | R     |
| 210 | A     | A   | A     | A   | A      | A     | A   | A   | A      | A        | A   | A      | A    | A          | A         | A      | A     |
| 211 | F     | F   | F     | L   | Y      | L     | F   | F   | F      | F        | F   | F      | F    | F          | F         | F      | V     |
| 212 | K     | K   | K     | K   | K      | K     | K   | K   | K      | K        | K   | K      | K    | K          | K         | K      | K     |
| 213 | A     | A   | A     | A   | A      | A     | A   | A   | A      | A        | A   | A      | A    | A          | A         | A      | A     |
| 214 | W     | W   | W     | W   | W      | W     | W   | W   | W      | W        | W   | W      | W    | W          | W         | W      | W     |
| 215 | A     | A   | A     | S   | A      | S     | S   | S   | S      | A        | S   | A      | A    | S          | A         | A      | S     |
| 216 | V     | V   | V     | V   | L      | V     | V   | L   | V      | V        | V   | V      | V    | V          | V         | V      | V     |
| 217 | A     | A   | A     | A   | V      | A     | A   | A   | A      | T        | A   | A      | A    | A          | A         | A      | A     |
| 218 | R     | R   | R     | R   | R      | R     | R   | R   | R      | H        | R   | R      | R    | R          | R         | R      | R     |
| 219 | L     | M   | L     | L   | L      | L     | L   | L   | L      | L        | L   | M      | M    | L          | L         | L      | L     |
| 220 | S     | S   | S     | S   | S      | S     | S   | S   | S      | S        | S   | S      | S    | S          | S         | S      | S     |

| No. | Human | Rat | Mouse | Cow | Rabbit | Sheep | Dog | Pig | Donkey | Elephant | Cat | Gerbil | Vole | Guinea Pig | Orangutan | Monkey | Horse |
|-----|-------|-----|-------|-----|--------|-------|-----|-----|--------|----------|-----|--------|------|------------|-----------|--------|-------|
| 221 | Q     | Q   | Q     | Q   | Q      | Q     | Q   | Q   | Q      | Q        | Q   | Q      | Q    | Q          | Q         | Q      | Q     |
| 222 | R     | R   | T     | K   | R      | K     | R   | R   | K      | R        | K   | T      | K    | K          | R         | K      | K     |
| 223 | F     | F   | F     | F   | F      | F     | F   | F   | F      | F        | F   | F      | F    | F          | F         | F      | F     |
| 224 | P     | P   | P     | P   | P      | P     | P   | P   | P      | P        | P   | P      | P    | P          | P         | P      | P     |
| 225 | K     | N   | N     | K   | K      | K     | K   | K   | K      | K        | K   | N      | K    | K          | K         | K      | K     |
| 226 | A     | A   | A     | A   | A      | A     | A   | A   | A      | A        | A   | A      | A    | A          | A         | A      | A     |
| 227 | E     | E   | D     | E   | D      | D     | D   | D   | D      | D        | E   | D      | D    | E          | E         | E      | D     |
| 228 | F     | F   | F     | F   | F      | F     | F   | F   | F      | F        | F   | F      | F    | F          | F         | F      | F     |
| 229 | A     | A   | A     | V   | T      | T     | A   | T   | A      | A        | A   | A      | A    | A          | A         | A      | A     |
| 230 | E     | E   | E     | E   | D      | D     | E   | E   | E      | E        | E   | E      | E    | E          | E         | E      | E     |
| 231 | V     | I   | I     | V   | I      | V     | I   | I   | V      | V        | I   | I      | I    | I          | V         | V      | V     |
| 232 | S     | T   | T     | T   | S      | T     | S   | S   | S      | S        | S   | T      | T    | S          | S         | S      | S     |
| 233 | K     | K   | K     | K   | K      | K     | K   | K   | K      | K        | K   | K      | K    | T          | K         | K      | K     |
| 234 | L     | L   | L     | L   | I      | I     | V   | I   | I      | L        | L   | L      | L    | I          | L         | L      | I     |
| 235 | V     | A   | A     | V   | V      | V     | V   | V   | V      | A        | V   | A      | A    | V          | V         | V      | V     |
| 236 | T     | T   | T     | T   | T      | T     | T   | T   | T      | T        | T   | T      | T    | T          | T         | T      | T     |
| 237 | D     | D   | D     | D   | D      | D     | D   | D   | D      | D        | D   | D      | D    | S          | D         | D      | D     |
| 238 | L     | V   | L     | L   | L      | L     | L   | L   | L      | L        | L   | L      | L    | L          | L         | L      | L     |
| 239 | T     | T   | T     | T   | T      | T     | T   | A   | T      | G        | A   | T      | T    | T          | T         | T      | T     |
| 240 | K     | K   | K     | K   | K      | K     | K   | K   | K      | K        | K   | K      | K    | K          | K         | K      | K     |
| 241 | V     | I   | V     | V   | V      | V     | V   | V   | V      | V        | I   | V      | V    | V          | V         | V      | V     |
| 242 | H     | N   | N     | H   | H      | H     | H   | H   | H      | Y        | H   | T      | T    | T          | H         | H      | H     |
| 243 | T     | K   | K     | K   | K      | K     | K   | K   | K      | Q        | K   | Q      | Q    | K          | T         | T      | K     |
| 244 | E     | E   | E     | E   | E      | E     | E   | E   | E      | E        | E   | E      | E    | E          | E         | E      | E     |
| 245 | C     | C   | C     | C   | C      | C     | C   | C   | C      | C        | C   | C      | C    | C          | C         | C      | C     |
| 246 | C     | C   | C     | C   | C      | C     | C   | C   | C      | C        | C   | C      | C    | C          | C         | C      | C     |
| 247 | H     | H   | H     | H   | H      | H     | H   | H   | H      | H        | H   | H      | H    | H          | H         | H      | H     |
| 248 | G     | G   | G     | G   | G      | G     | G   | G   | G      | G        | G   | G      | G    | G          | G         | G      | G     |
| 249 | D     | D   | D     | D   | D      | D     | D   | D   | D      | D        | D   | D      | D    | D          | D         | D      | D     |
| 250 | L     | L   | L     | L   | L      | L     | L   | L   | L      | L        | L   | L      | L    | L          | L         | L      | L     |
| 251 | L     | L   | L     | L   | L      | L     | L   | L   | L      | L        | L   | L      | L    | L          | L         | L      | L     |
| 252 | E     | E   | E     | E   | E      | E     | E   | E   | E      | E        | E   | E      | E    | E          | E         | E      | E     |
| 253 | C     | C   | C     | C   | C      | C     | C   | C   | C      | C        | C   | C      | C    | C          | C         | C      | C     |
| 254 | A     | A   | A     | A   | A      | A     | A   | A   | A      | A        | A   | A      | V    | A          | A         | A      | A     |
| 255 | D     | D   | D     | D   | D      | D     | D   | D   | D      | D        | D   | D      | D    | D          | D         | D      | D     |
| 256 | D     | D   | D     | D   | D      | D     | D   | D   | D      | D        | D   | D      | D    | D          | D         | D      | D     |
| 257 | R     | R   | R     | R   | R      | R     | R   | R   | R      | R        | R   | R      | R    | R          | R         | R      | R     |
| 258 | A     | A   | A     | A   | A      | A     | A   | A   | A      | A        | A   | A      | L    | Q          | A         | A      | A     |
| 259 | D     | E   | E     | D   | D      | D     | D   | D   | D      | D        | D   | E      | E    | E          | D         | D      | D     |
| 260 | L     | L   | L     | L   | L      | L     | L   | L   | L      | L        | L   | L      | L    | L          | L         | L      | L     |
| 261 | A     | A   | A     | A   | A      | A     | A   | A   | T      | A        | A   | A      | A    | A          | A         | A      | A     |

| No. | Human | Rat | Mouse | Cow | Rabbit | Sheep | Dog | Pig | Donkey | Elephant | Cat | Gerbil | Vole | Guinea Pig | Orangutan | Monkey | Horse |
|-----|-------|-----|-------|-----|--------|-------|-----|-----|--------|----------|-----|--------|------|------------|-----------|--------|-------|
| 262 | K     | K   | K     | K   | K      | K     | K   | K   | K      | K        | K   | K      | K    | K          | K         | K      | K     |
| 263 | Y     | Y   | Y     | Y   | Y      | Y     | Y   | Y   | Y      | Y        | Y   | Y      | Y    | Y          | Y         | Y      | Y     |
| 264 | I     | M   | M     | I   | M      | I     | M   | I   | I      | I        | I   | M      | M    | M          | I         | M      | I     |
| 265 | C     | C   | C     | C   | C      | C     | C   | C   | C      | C        | C   | C      | C    | C          | C         | C      | C     |
| 266 | E     | E   | E     | D   | E      | D     | E   | E   | E      | D        | E   | E      | D    | E          | E         | E      | E     |
| 267 | N     | N   | N     | N   | H      | H     | N   | N   | H      | N        | N   | N      | N    | H          | N         | N      | H     |
| 268 | Q     | Q   | Q     | Q   | Q      | Q     | Q   | Q   | Q      | Q        | Q   | Q      | Q    | Q          | Q         | Q      | Q     |
| 269 | D     | A   | A     | D   | E      | D     | D   | D   | D      | E        | D   | A      | A    | D          | D         | D      | D     |
| 270 | S     | T   | T     | T   | T      | A     | S   | T   | S      | T        | S   | S      | T    | S          | S         | S      | S     |
| 271 | I     | I   | I     | I   | I      | L     | I   | I   | I      | L        | I   | I      | I    | I          | I         | I      | I     |
| 272 | S     | S   | S     | S   | S      | S     | S   | S   | S      | S        | S   | S      | S    | S          | S         | S      | S     |
| 273 | S     | S   | S     | S   | S      | S     | T   | T   | G      | S        | T   | S      | S    | S          | S         | S      | G     |
| 274 | K     | K   | K     | K   | H      | K     | K   | K   | K      | K        | K   | K      | K    | K          | K         | K      | K     |
| 275 | L     | L   | L     | L   | L      | L     | L   | L   | L      | L        | L   | L      | L    | L          | L         | L      | L     |
| 276 | K     | Q   | Q     | K   | K      | K     | K   | K   | K      | K        | K   | Q      | H    | K          | K         | K      | K     |
| 277 | E     | A   | T     | E   | E      | E     | E   | E   | A      | E        | E   | A      | T    | E          | E         | E      | A     |
| 278 | C     | C   | C     | C   | C      | C     | C   | C   | C      | C        | C   | C      | C    | C          | C         | C      | C     |
| 279 | C     | C   | C     | C   | C      | C     | C   | C   | C      | C        | C   | C      | C    | C          | C         | C      | C     |
| 280 | E     | D   | D     | D   | D      | D     | D   | D   | D      | D        | G   | D      | D    | V          | E         | D      | D     |
| 281 | K     | K   | K     | K   | K      | K     | K   | K   | K      | K        | K   | K      | K    | K          | K         | K      | K     |
| 282 | P     | P   | P     | P   | P      | P     | P   | P   | P      | P        | P   | E      | P    | P          | P         | P      | P     |
| 283 | L     | V   | L     | L   | I      | V     | V   | L   | L      | V        | V   | M      | V    | T          | L         | L      | L     |
| 284 | L     | L   | L     | L   | L      | L     | L   | L   | L      | L        | L   | L      | L    | L          | L         | L      | L     |
| 285 | E     | Q   | K     | E   | E      | E     | E   | E   | Q      | A        | E   | Q      | Q    | Q          | E         | E      | Q     |
| 286 | K     | K   | K     | K   | K      | K     | K   | K   | K      | K        | K   | K      | K    | K          | K         | K      | K     |
| 287 | S     | S   | A     | S   | A      | S     | S   | S   | S      | S        | S   | S      | A    | A          | S         | S      | S     |
| 288 | H     | Q   | H     | H   | H      | H     | Q   | H   | H      | H        | H   | Q      | H    | H          | H         | H      | H     |
| 289 | C     | C   | C     | C   | C      | C     | C   | C   | C      | C        | C   | C      | C    | C          | C         | C      | C     |
| 290 | I     | L   | L     | I   | I      | I     | L   | I   | I      | I        | I   | L      | L    | I          | I         | L      | I     |
| 291 | A     | A   | S     | A   | Y      | A     | A   | A   | A      | A        | S   | A      | A    | L          | A         | A      | A     |
| 292 | E     | E   | E     | E   | G      | E     | E   | E   | E      | E        | E   | E      | E    | E          | E         | E      | E     |
| 293 | V     | I   | V     | V   | L      | V     | V   | A   | V      | L        | V   | V      | V    | I          | V         | V      | V     |
| 294 | E     | E   | E     | E   | H      | D     | E   | K   | K      | D        | E   | E      | D    | Q          | E         | E      | K     |
| 295 | N     | H   | H     | K   | N      | K     | R   | R   | E      | K        | R   | H      | H    | R          | N         | N      | E     |
| 296 | D     | D   | D     | D   | D      | D     | D   | D   | D      | D        | D   | D      | D    | D          | D         | D      | D     |
| 297 | E     | N   | T     | A   | E      | A     | E   | E   | D      | D        | E   | D      | E    | E          | E         | E      | D     |
| 298 | M     | I   | M     | I   | T      | V     | L   | L   | L      | P        | L   | M      | M    | L          | M         | M      | L     |
| 299 | P     | P   | P     | P   | P      | P     | P   | P   | P      | P        | P   | P      | P    | P          | P         | P      | P     |
| 300 | A     | A   | A     | E   | A      | E     | G   | A   | S      | A        | A   | A      | A    | T          | A         | A      | S     |
| 301 | D     | D   | D     | N   | G      | N     | D   | D   | D      | D        | D   | D      | D    | E          | D         | D      | D     |
| 302 | L     | L   | L     | L   | L      | L     | L   | L   | L      | L        | L   | L      | L    | L          | L         | L      | L     |

| No. | Human | Rat | Mouse | Cow | Rabbit | Sheep | Dog | Pig | Donkey | Elephant | Cat | Gerbil | Vole | Guinea Pig | Orangutan | Monkey | Horse |
|-----|-------|-----|-------|-----|--------|-------|-----|-----|--------|----------|-----|--------|------|------------|-----------|--------|-------|
| 303 | P     | P   | P     | P   | P      | P     | P   | N   | P      | P        | P   | P      | T    | P          | P         | P      | P     |
| 304 | S     | S   | A     | P   | A      | P     | S   | P   | A      | S        | P   | A      | P    | D          | S         | S      | A     |
| 305 | L     | I   | I     | L   | V      | L     | L   | L   | L      | I        | L   | L      | L    | L          | L         | L      | L     |
| 306 | A     | A   | A     | T   | A      | T     | A   | E   | A      | V        | A   | T      | A    | A          | A         | A      | A     |
| 307 | A     | A   | A     | A   | E      | A     | A   | H   | A      | P        | V   | A      | D    | V          | A         | A      | A     |
| 308 | D     | D   | D     | D   | E      | D     | D   | D   | D      | D        | D   | D      | D    | D          | D         | D      | D     |
| 309 | F     | F   | F     | F   | F      | F     | F   | F   | F      | Y        | F   | F      | F    | F          | F         | Y      | F     |
| 310 | V     | V   | V     | A   | V      | A     | V   | V   | A      | V        | V   | V      | V    | V          | V         | V      | A     |
| 311 | E     | E   | E     | E   | E      | E     | E   | E   | E      | E        | E   | E      | E    | E          | E         | E      | E     |
| 312 | S     | D   | D     | D   | D      | D     | D   | D   | D      | D        | D   | D      | D    | D          | S         | S      | D     |
| 313 | K     | K   | Q     | K   | K      | K     | K   | K   | K      | K        | K   | K      | K    | K          | K         | K      | K     |
| 314 | D     | E   | E     | D   | D      | E     | E   | E   | E      | D        | E   | D      | D    | E          | D         | D      | E     |
| 315 | V     | V   | V     | V   | V      | V     | V   | V   | I      | V        | V   | V      | V    | V          | V         | V      | I     |
| 316 | C     | C   | C     | C   | C      | C     | C   | C   | C      | C        | C   | C      | C    | C          | C         | C      | C     |
| 317 | K     | K   | K     | K   | K      | K     | K   | K   | K      | K        | K   | K      | K    | K          | K         | K      | K     |
| 318 | N     | N   | N     | N   | N      | N     | N   | N   | H      | N        | N   | N      | N    | N          | N         | N      | H     |
| 319 | Y     | Y   | Y     | Y   | Y      | Y     | Y   | Y   | Y      | Y        | Y   | Y      | Y    | F          | Y         | Y      | Y     |
| 320 | A     | A   | A     | Q   | E      | Q     | Q   | K   | K      | Q        | Q   | A      | A    | A          | A         | A      | K     |
| 321 | E     | E   | E     | E   | E      | E     | E   | E   | D      | E        | E   | E      | E    | E          | E         | E      | D     |
| 322 | A     | A   | A     | A   | A      | A     | A   | A   | A      | A        | A   | A      | A    | A          | A         | A      | A     |
| 323 | K     | K   | K     | K   | K      | K     | K   | K   | K      | K        | K   | K      | K    | K          | K         | K      | K     |
| 324 | D     | D   | D     | D   | D      | D     | D   | D   | D      | D        | D   | D      | D    | D          | D         | D      | D     |
| 325 | V     | V   | V     | A   | L      | V     | V   | V   | V      | I        | V   | V      | V    | V          | V         | V      | V     |
| 326 | F     | F   | F     | F   | F      | F     | F   | F   | F      | F        | F   | F      | F    | F          | F         | F      | F     |
| 327 | L     | L   | L     | L   | L      | L     | L   | L   | L      | L        | L   | L      | L    | L          | L         | L      | L     |
| 328 | G     | G   | G     | G   | G      | G     | G   | G   | G      | G        | G   | G      | G    | G          | G         | G      | G     |
| 329 | M     | T   | T     | S   | K      | S     | T   | T   | T      | T        | T   | T      | T    | T          | M         | M      | T     |
| 330 | F     | F   | F     | F   | F      | F     | F   | F   | F      | F        | F   | F      | F    | F          | F         | F      | F     |
| 331 | L     | L   | L     | L   | L      | L     | L   | L   | L      | L        | L   | L      | L    | L          | L         | L      | L     |
| 332 | Y     | Y   | Y     | Y   | Y      | Y     | Y   | Y   | Y      | Y        | Y   | Y      | Y    | Y          | Y         | Y      | Y     |
| 333 | E     | E   | E     | E   | E      | E     | E   | E   | E      | E        | E   | E      | E    | E          | E         | E      | E     |
| 334 | Y     | Y   | Y     | Y   | Y      | Y     | Y   | Y   | Y      | Y        | Y   | Y      | Y    | Y          | Y         | Y      | Y     |
| 335 | A     | S   | S     | S   | S      | S     | A   | S   | S      | S        | S   | S      | A    | S          | A         | A      | S     |
| 336 | R     | R   | R     | R   | R      | R     | R   | R   | R      | R        | R   | R      | R    | R          | R         | R      | R     |
| 337 | R     | R   | R     | R   | R      | R     | R   | R   | R      | R        | R   | R      | R    | R          | R         | R      | R     |
| 338 | H     | H   | H     | H   | H      | H     | H   | H   | H      | H        | H   | H      | H    | H          | H         | H      | H     |
| 339 | P     | P   | P     | P   | P      | P     | P   | P   | P      | P        | P   | P      | P    | P          | P         | P      | P     |
| 340 | D     | D   | D     | E   | D      | E     | E   | D   | D      | E        | E   | E      | D    | E          | D         | D      | D     |
| 341 | Y     | Y   | Y     | Y   | Y      | Y     | Y   | Y   | Y      | Y        | Y   | Y      | Y    | Y          | Y         | Y      | Y     |
| 342 | S     | S   | S     | A   | S      | A     | S   | S   | S      | S        | S   | S      | S    | S          | S         | S      | S     |
| 343 | V     | V   | V     | V   | V      | V     | V   | V   | V      | A        | V   | V      | V    | I          | V         | V      | V     |

| No. | Human | Rat | Mouse | Cow | Rabbit | Sheep | Dog | Pig | Donkey | Elephant | Cat | Gerbil | Vole | Guinea Pig | Orangutan | Monkey | Horse |
|-----|-------|-----|-------|-----|--------|-------|-----|-----|--------|----------|-----|--------|------|------------|-----------|--------|-------|
| 344 | V     | S   | S     | S   | V      | S     | S   | S   | S      | F        | S   | S      | A    | G          | V         | M      | S     |
| 345 | L     | L   | L     | V   | L      | V     | L   | L   | L      | L        | L   | L      | L    | M          | L         | L      | L     |
| 346 | L     | L   | L     | L   | L      | L     | L   | L   | L      | L        | L   | L      | L    | L          | L         | L      | L     |
| 347 | L     | L   | L     | L   | L      | L     | L   | L   | L      | L        | L   | L      | L    | L          | L         | L      | L     |
| 348 | R     | R   | R     | R   | R      | R     | R   | R   | R      | R        | R   | R      | R    | R          | R         | R      | R     |
| 349 | L     | L   | L     | L   | L      | L     | L   | I   | I      | I        | L   | L      | L    | I          | L         | L      | I     |
| 350 | A     | A   | A     | A   | G      | A     | A   | A   | A      | A        | A   | A      | A    | A          | A         | A      | A     |
| 351 | K     | K   | K     | K   | K      | K     | K   | K   | K      | K        | K   | K      | K    | K          | K         | K      | K     |
| 352 | T     | K   | K     | E   | A      | E     | E   | I   | T      | E        | E   | K      | K    | G          | T         | A      | T     |
| 353 | Y     | Y   | Y     | Y   | Y      | Y     | Y   | Y   | Y      | Y        | Y   | Y      | Y    | Y          | Y         | Y      | Y     |
| 354 | E     | E   | E     | E   | E      | E     | E   | E   | E      | E        | E   | E      | E    | E          | E         | E      | E     |
| 355 | T     | A   | A     | A   | A      | A     | A   | A   | A      | A        | A   | A      | A    | A          | T         | A      | A     |
| 356 | T     | T   | T     | T   | T      | T     | T   | T   | T      | T        | T   | T      | T    | K          | T         | T      | T     |
| 357 | L     | L   | L     | L   | L      | L     | L   | L   | L      | L        | L   | L      | L    | L          | L         | L      | L     |
| 358 | E     | E   | E     | E   | K      | E     | E   | E   | E      | E        | E   | E      | E    | E          | E         | E      | E     |
| 359 | K     | K   | K     | E   | K      | D     | K   | D   | K      | R        | K   | K      | K    | K          | K         | K      | K     |
| 360 | C     | C   | C     | C   | C      | C     | C   | C   | C      | C        | C   | C      | C    | C          | C         | C      | C     |
| 361 | C     | C   | C     | C   | C      | C     | C   | C   | C      | C        | C   | C      | C    | C          | C         | C      | C     |
| 362 | A     | A   | A     | A   | A      | A     | A   | A   | A      | A        | A   | A      | A    | A          | A         | A      | A     |
| 363 | A     | E   | E     | K   | T      | K     | T   | K   | E      | A        | T   | E      | E    | E          | A         | A      | E     |
| 364 | A     | G   | A     | D   | D      | E     | D   | E   | A      | A        | D   | A      | A    | A          | A         | A      | A     |
| 365 | D     | D   | N     | D   | D      | D     | D   | D   | D      | D        | D   | D      | D    | D          | D         | D      | D     |
| 366 | P     | P   | P     | P   | P      | P     | P   | P   | P      | P        | P   | P      | P    | P          | P         | P      | P     |
| 367 | H     | P   | P     | H   | H      | H     | P   | P   | P      | H        | P   | H      | H    | H          | H         | H      | P     |
| 368 | E     | A   | A     | A   | A      | A     | T   | A   | A      | A        | A   | A      | A    | A          | E         | E      | A     |
| 369 | C     | C   | C     | C   | C      | C     | C   | C   | C      | C        | C   | C      | C    | C          | C         | C      | C     |
| 370 | Y     | Y   | Y     | Y   | Y      | Y     | Y   | Y   | Y      | Y        | Y   | Y      | Y    | Y          | Y         | Y      | Y     |
| 371 | A     | G   | G     | S   | A      | A     | A   | A   | A      | A        | A   | G      | G    | A          | A         | A      | R     |
| 372 | K     | T   | T     | T   | K      | T     | K   | T   | T      | K        | H   | H      | K    | K          | K         | K      | T     |
| 373 | V     | V   | V     | V   | V      | V     | V   | V   | V      | V        | V   | V      | V    | V          | V         | V      | V     |
| 374 | F     | L   | L     | F   | L      | F     | L   | F   | F      | L        | F   | F      | F    | F          | F         | F      | F     |
| 375 | D     | A   | A     | D   | D      | D     | D   | D   | D      | D        | D   | D      | D    | D          | D         | D      | D     |
| 376 | E     | E   | E     | K   | E      | K     | E   | K   | Q      | A        | E   | E      | E    | E          | E         | E      | Q     |
| 377 | F     | F   | F     | L   | F      | L     | F   | F   | F      | F        | F   | F      | F    | L          | F         | F      | F     |
| 378 | K     | Q   | Q     | K   | Q      | K     | K   | Q   | T      | T        | K   | K      | Q    | Q          | K         | Q      | T     |
| 379 | P     | P   | P     | H   | P      | H     | P   | P   | P      | P        | P   | P      | P    | P          | P         | P      | P     |
| 380 | L     | L   | L     | L   | L      | L     | L   | L   | L      | L        | L   | L      | L    | L          | L         | L      | L     |
| 381 | V     | V   | V     | V   | V      | V     | V   | V   | V      | V        | V   | V      | V    | I          | V         | V      | V     |
| 382 | E     | E   | E     | D   | D      | D     | D   | D   | E      | E        | E   | E      | E    | D          | E         | E      | E     |
| 383 | E     | E   | E     | E   | E      | E     | E   | E   | E      | E        | E   | E      | E    | E          | E         | E      | E     |
| 384 | P     | P   | P     | P   | P      | P     | P   | P   | P      | P        | P   | P      | P    | P          | P         | P      | P     |



| No. | Human | Rat | Mouse | Cow | Rabbit | Sheep | Dog | Pig | Donkey | Elephant | Cat | Gerbil | Vole | Guinea Pig | Orangutan | Monkey | Horse |
|-----|-------|-----|-------|-----|--------|-------|-----|-----|--------|----------|-----|--------|------|------------|-----------|--------|-------|
| 385 | Q     | K   | K     | Q   | K      | Q     | Q   | K   | K      | Q        | H   | Q      | K    | K          | Q         | Q      | K     |
| 386 | N     | N   | N     | N   | N      | N     | N   | N   | S      | G        | N   | N      | N    | K          | N         | N      | S     |
| 387 | L     | L   | L     | L   | L      | L     | L   | L   | L      | L        | L   | L      | L    | L          | L         | L      | L     |
| 388 | I     | V   | V     | I   | V      | I     | V   | I   | V      | V        | V   | V      | V    | V          | I         | V      | V     |
| 389 | K     | K   | K     | K   | K      | K     | K   | K   | K      | K        | K   | K      | K    | Q          | K         | K      | K     |
| 390 | Q     | T   | T     | Q   | Q      | K     | T   | Q   | K      | Q        | T   | S      | A    | Q          | Q         | Q      | K     |
| 391 | N     | N   | N     | N   | N      | N     | N   | N   | N      | N        | N   | N      | N    | N          | N         | N      | N     |
| 392 | C     | C   | C     | C   | C      | C     | C   | C   | C      | C        | C   | C      | C    | C          | C         | C      | C     |
| 393 | E     | E   | D     | D   | E      | E     | E   | E   | D      | E        | E   | E      | E    | E          | E         | E      | D     |
| 394 | L     | L   | L     | Q   | L      | L     | L   | L   | L      | H        | L   | L      | L    | L          | L         | L      | L     |
| 395 | F     | Y   | Y     | F   | Y      | F     | F   | F   | F      | F        | F   | Y      | F    | F          | F         | F      | F     |
| 396 | E     | E   | E     | E   | E      | E     | E   | E   | E      | E        | E   | E      | E    | D          | E         | E      | E     |
| 397 | Q     | K   | K     | K   | Q      | K     | K   | K   | E      | Q        | K   | K      | K    | K          | Q         | Q      | E     |
| 398 | L     | L   | L     | L   | L      | H     | L   | L   | V      | L        | L   | L      | L    | L          | L         | L      | V     |
| 399 | G     | G   | G     | G   | G      | G     | G   | G   | G      | G        | G   | G      | G    | G          | G         | G      | G     |
| 400 | E     | E   | E     | E   | D      | E     | E   | E   | E      | E        | E   | E      | E    | E          | E         | E      | E     |
| 401 | Y     | Y   | Y     | Y   | Y      | Y     | Y   | Y   | Y      | Y        | Y   | Y      | Y    | Y          | Y         | Y      | Y     |
| 402 | K     | G   | G     | G   | N      | G     | G   | G   | D      | G        | G   | G      | G    | G          | K         | K      | D     |
| 403 | F     | F   | F     | F   | F      | F     | F   | F   | F      | F        | F   | F      | F    | F          | F         | F      | F     |
| 404 | Q     | Q   | Q     | Q   | Q      | Q     | Q   | Q   | Q      | T        | Q   | Q      | Q    | Q          | Q         | Q      | Q     |
| 405 | N     | N   | N     | N   | N      | N     | N   | N   | N      | N        | N   | N      | N    | N          | N         | N      | N     |
| 406 | A     | A   | A     | A   | A      | A     | A   | A   | A      | E        | A   | A      | A    | A          | A         | A      | A     |
| 407 | L     | V   | I     | L   | L      | L     | L   | L   | L      | L        | L   | V      | L    | L          | L         | L      | L     |
| 408 | L     | L   | L     | I   | L      | I     | L   | I   | I      | A        | L   | L      | L    | A          | L         | L      | I     |
| 409 | V     | V   | V     | V   | V      | V     | V   | V   | V      | V        | V   | V      | V    | V          | V         | V      | V     |
| 410 | R     | R   | R     | R   | R      | R     | R   | R   | R      | R        | R   | R      | R    | R          | R         | R      | R     |
| 411 | Y     | Y   | Y     | Y   | Y      | Y     | Y   | Y   | Y      | Y        | Y   | Y      | Y    | Y          | Y         | Y      | Y     |
| 412 | T     | T   | T     | T   | T      | T     | T   | T   | T      | T        | T   | T      | T    | T          | T         | T      | T     |
| 413 | K     | Q   | Q     | R   | K      | R     | K   | K   | K      | R        | K   | K      | Q    | Q          | K         | K      | K     |
| 414 | K     | K   | K     | K   | K      | K     | K   | K   | K      | K        | K   | K      | K    | K          | K         | K      | K     |
| 415 | V     | A   | A     | V   | V      | A     | A   | V   | A      | V        | V   | A      | A    | A          | V         | V      | A     |
| 416 | P     | P   | P     | P   | P      | P     | P   | P   | P      | P        | P   | P      | P    | P          | P         | P      | P     |
| 417 | Q     | Q   | Q     | Q   | Q      | Q     | Q   | Q   | Q      | Q        | Q   | Q      | Q    | Q          | Q         | Q      | Q     |
| 418 | V     | V   | V     | V   | V      | V     | V   | V   | V      | V        | V   | V      | V    | V          | V         | V      | V     |
| 419 | S     | S   | S     | S   | S      | S     | S   | S   | S      | S        | S   | S      | S    | S          | S         | S      | S     |
| 420 | T     | T   | T     | T   | T      | T     | T   | T   | T      | T        | T   | T      | T    | T          | T         | T      | T     |
| 421 | P     | P   | P     | P   | P      | P     | P   | P   | P      | P        | P   | P      | P    | P          | P         | P      | P     |
| 422 | T     | T   | T     | T   | T      | T     | T   | T   | T      | T        | T   | T      | T    | T          | T         | T      | T     |
| 423 | L     | L   | L     | L   | L      | L     | L   | L   | L      | L        | L   | L      | L    | L          | L         | L      | L     |
| 424 | V     | V   | V     | V   | V      | V     | V   | V   | V      | V        | V   | V      | V    | V          | V         | V      | V     |
| 425 | E     | E   | E     | E   | E      | E     | E   | E   | E      | E        | E   | E      | E    | E          | E         | E      | E     |

| No. | Human | Rat | Mouse | Cow | Rabbit | Sheep | Dog | Pig | Donkey | Elephant | Cat | Gerbil | Vole | Guinea Pig | Orangutan | Monkey | Horse |
|-----|-------|-----|-------|-----|--------|-------|-----|-----|--------|----------|-----|--------|------|------------|-----------|--------|-------|
| 426 | V     | A   | A     | V   | I      | I     | V   | V   | I      | V        | V   | A      | V    | Y          | V         | V      | I     |
| 427 | S     | A   | A     | S   | S      | S     | S   | A   | G      | S        | S   | A      | S    | A          | S         | S      | G     |
| 428 | R     | R   | R     | R   | R      | R     | R   | R   | R      | R        | R   | R      | R    | R          | R         | R      | R     |
| 429 | N     | N   | N     | S   | S      | S     | K   | K   | T      | K        | S   | S      | N    | K          | N         | N      | T     |
| 430 | L     | L   | L     | L   | L      | L     | L   | L   | L      | L        | L   | L      | L    | L          | L         | L      | L     |
| 431 | G     | G   | G     | G   | G      | G     | G   | G   | G      | G        | G   | G      | G    | G          | G         | G      | G     |
| 432 | K     | R   | R     | K   | K      | K     | K   | L   | K      | R        | K   | R      | K    | S          | K         | K      | K     |
| 433 | V     | V   | V     | V   | V      | V     | V   | V   | V      | V        | V   | V      | V    | V          | V         | V      | V     |
| 434 | G     | G   | G     | G   | G      | G     | G   | G   | G      | G        | G   | G      | G    | G          | G         | G      | G     |
| 435 | S     | T   | T     | T   | S      | T     | T   | S   | S      | G        | S   | T      | T    | T          | S         | A      | S     |
| 436 | K     | K   | K     | R   | K      | K     | K   | R   | R      | K        | K   | H      | K    | K          | K         | K      | R     |
| 437 | C     | C   | C     | C   | C      | C     | C   | C   | C      | C        | C   | C      | C    | C          | C         | C      | C     |
| 438 | C     | C   | C     | C   | C      | C     | C   | C   | C      | C        | C   | C      | C    | C          | C         | C      | C     |
| 439 | K     | T   | T     | T   | K      | A     | K   | K   | K      | K        | T   | A      | A    | S          | K         | K      | K     |
| 440 | H     | L   | L     | K   | H      | K     | K   | R   | L      | L        | H   | L      | L    | L          | H         | L      | L     |
| 441 | P     | P   | P     | P   | P      | P     | P   | P   | P      | A        | P   | P      | P    | P          | P         | P      | P     |
| 442 | E     | E   | E     | E   | E      | E     | E   | E   | E      | E        | E   | E      | E    | E          | E         | E      | E     |
| 443 | A     | A   | D     | S   | A      | S     | S   | E   | S      | A        | A   | K      | A    | T          | A         | A      | S     |
| 444 | K     | Q   | Q     | E   | E      | E     | E   | E   | E      | K        | E   | K      | D    | E          | K         | K      | E     |
| 445 | R     | R   | R     | R   | R      | R     | R   | R   | R      | R        | R   | R      | R    | R          | R         | R      | R     |
| 446 | M     | L   | L     | M   | L      | M     | M   | L   | L      | M        | L   | L      | L    | L          | M         | M      | L     |
| 447 | P     | P   | P     | P   | P      | P     | S   | S   | P      | P        | S   | P      | P    | S          | P         | P      | P     |
| 448 | C     | C   | C     | C   | C      | C     | C   | C   | C      | C        | C   | C      | C    | C          | C         | C      | C     |
| 449 | A     | V   | V     | T   | V      | T     | A   | A   | S      | A        | A   | V      | V    | T          | A         | A      | S     |
| 450 | E     | E   | E     | E   | E      | E     | E   | E   | E      | E        | E   | E      | E    | E          | E         | E      | E     |
| 451 | D     | D   | D     | D   | D      | D     | D   | D   | N      | D        | D   | D      | D    | N          | D         | D      | N     |
| 452 | Y     | Y   | Y     | Y   | Y      | Y     | F   | Y   | H      | Y        | Y   | Y      | Y    | Y          | Y         | Y      | H     |
| 453 | L     | L   | L     | L   | L      | L     | L   | L   | L      | L        | L   | L      | L    | L          | L         | L      | L     |
| 454 | S     | S   | S     | S   | S      | S     | S   | S   | A      | S        | S   | S      | S    | A          | S         | S      | A     |
| 455 | V     | A   | A     | L   | V      | L     | V   | L   | L      | L        | V   | A      | A    | L          | V         | V      | L     |
| 456 | V     | I   | I     | I   | V      | I     | V   | V   | A      | V        | V   | I      | I    | I          | V         | V      | A     |
| 457 | L     | L   | L     | L   | L      | L     | L   | L   | L      | L        | L   | L      | L    | L          | L         | L      | L     |
| 458 | N     | N   | N     | N   | N      | N     | N   | N   | N      | N        | N   | N      | N    | N          | N         | N      | N     |
| 459 | Q     | R   | R     | R   | R      | R     | R   | R   | R      | R        | R   | R      | H    | R          | Q         | R      | R     |
| 460 | L     | L   | V     | L   | L      | L     | L   | L   | L      | L        | L   | V      | L    | L          | L         | L      | L     |
| 461 | C     | C   | C     | C   | C      | C     | C   | C   | C      | C        | C   | C      | C    | C          | C         | C      | C     |
| 462 | V     | V   | L     | V   | V      | V     | V   | V   | V      | V        | V   | L      | V    | I          | V         | V      | V     |
| 463 | L     | L   | L     | L   | L      | L     | L   | L   | L      | L        | L   | L      | L    | L          | L         | L      | L     |
| 464 | H     | H   | H     | H   | H      | H     | H   | H   | H      | H        | H   | H      | H    | H          | H         | H      | H     |
| 465 | E     | E   | E     | E   | E      | E     | E   | E   | E      | E        | E   | E      | E    | E          | E         | E      | E     |
| 466 | K     | K   | K     | K   | K      | K     | K   | K   | K      | K        | K   | K      | K    | K          | K         | K      | K     |

| No. | Human | Rat | Mouse | Cow | Rabbit | Sheep | Dog | Pig | Donkey | Elephant | Cat | Gerbil | Vole | Guinea Pig | Orangutan | Monkey | Horse |
|-----|-------|-----|-------|-----|--------|-------|-----|-----|--------|----------|-----|--------|------|------------|-----------|--------|-------|
| 467 | T     | T   | T     | T   | T      | T     | T   | T   | T      | T        | T   | T      | T    | T          | T         | T      | T     |
| 468 | P     | P   | P     | P   | P      | P     | P   | P   | P      | P        | P   | P      | P    | P          | P         | P      | P     |
| 469 | V     | V   | V     | V   | V      | V     | V   | V   | V      | V        | V   | V      | V    | V          | V         | V      | V     |
| 470 | S     | S   | S     | S   | S      | S     | S   | S   | S      | S        | S   | S      | S    | S          | S         | S      | S     |
| 471 | D     | E   | E     | E   | E      | E     | E   | E   | E      | E        | E   | E      | E    | E          | D         | E      | E     |
| 472 | R     | K   | H     | K   | K      | K     | R   | K   | K      | R        | R   | Q      | Q    | R          | R         | K      | K     |
| 473 | V     | V   | V     | V   | V      | V     | V   | V   | I      | I        | V   | V      | V    | V          | V         | V      | I     |
| 474 | T     | T   | T     | T   | T      | T     | T   | T   | T      | T        | T   | T      | T    | T          | T         | T      | T     |
| 475 | K     | K   | K     | K   | K      | K     | K   | K   | K      | K        | K   | K      | K    | K          | K         | K      | K     |
| 476 | C     | C   | C     | C   | C      | C     | C   | C   | C      | C        | C   | C      | C    | C          | C         | C      | C     |
| 477 | C     | C   | C     | C   | C      | C     | C   | C   | C      | C        | C   | C      | C    | C          | C         | C      | C     |
| 478 | T     | S   | S     | T   | S      | T     | S   | T   | T      | T        | T   | S      | T    | T          | T         | T      | T     |
| 479 | E     | G   | G     | E   | E      | E     | E   | E   | D      | E        | E   | G      | G    | E          | E         | E      | D     |
| 480 | S     | S   | S     | S   | S      | S     | S   | S   | S      | S        | S   | S      | S    | S          | S         | S      | S     |
| 481 | L     | L   | L     | L   | L      | L     | L   | L   | L      | L        | L   | L      | V    | L          | L         | L      | L     |
| 482 | V     | V   | V     | V   | V      | V     | V   | V   | A      | V        | V   | V      | V    | V          | V         | V      | A     |
| 483 | N     | E   | E     | N   | D      | N     | N   | N   | E      | N        | N   | E      | E    | N          | N         | N      | E     |
| 484 | R     | R   | R     | R   | R      | R     | R   | R   | R      | R        | R   | R      | R    | R          | R         | R      | R     |
| 485 | R     | R   | R     | R   | R      | R     | R   | R   | R      | R        | R   | R      | R    | R          | R         | R      | R     |
| 486 | P     | P   | P     | P   | P      | P     | P   | P   | P      | P        | P   | P      | P    | P          | P         | P      | P     |
| 487 | C     | C   | C     | C   | C      | C     | C   | C   | C      | C        | C   | C      | C    | C          | C         | C      | C     |
| 488 | F     | F   | F     | F   | F      | F     | F   | F   | F      | F        | F   | F      | F    | F          | F         | F      | F     |
| 489 | S     | S   | S     | S   | S      | S     | S   | S   | S      | T        | S   | S      | S    | S          | S         | S      | S     |
| 490 | A     | A   | A     | A   | A      | D     | G   | A   | A      | A        | A   | A      | A    | A          | A         | A      | A     |
| 491 | L     | L   | L     | L   | L      | L     | L   | L   | L      | L        | L   | L      | L    | L          | L         | L      | L     |
| 492 | E     | T   | T     | T   | G      | T     | E   | T   | E      | Q        | Q   | P      | P    | H          | E         | E      | E     |
| 493 | V     | V   | V     | P   | P      | L     | V   | P   | L      | T        | V   | V      | V    | V          | V         | L      | L     |
| 494 | D     | D   | D     | D   | D      | D     | D   | D   | D      | D        | D   | D      | D    | D          | D         | D      | D     |
| 495 | E     | E   | E     | E   | E      | E     | E   | E   | E      | E        | E   | E      | E    | E          | E         | E      | E     |
| 496 | T     | T   | T     | T   | T      | T     | T   | T   | G      | T        | T   | T      | H    | T          | T         | A      | G     |
| 497 | Y     | Y   | Y     | Y   | Y      | Y     | Y   | Y   | Y      | Y        | Y   | Y      | Y    | Y          | Y         | Y      | Y     |
| 498 | V     | V   | V     | V   | V      | V     | V   | K   | I      | V        | V   | V      | V    | V          | V         | V      | V     |
| 499 | P     | P   | P     | P   | P      | P     | P   | P   | P      | P        | P   | P      | P    | P          | P         | P      | P     |
| 500 | K     | K   | K     | K   | K      | K     | K   | K   | K      | K        | K   | K      | K    | K          | K         | K      | K     |
| 501 | E     | E   | E     | A   | E      | P     | E   | E   | E      | E        | E   | E      | E    | P          | E         | A      | E     |
| 502 | F     | F   | F     | F   | F      | F     | F   | F   | F      | F        | F   | F      | F    | F          | F         | F      | F     |
| 503 | N     | K   | K     | D   | N      | D     | N   | V   | K      | N        | S   | K      | K    | H          | N         | N      | K     |
| 504 | A     | A   | A     | E   | A      | E     | A   | E   | A      | A        | A   | A      | A    | A          | A         | A      | A     |
| 505 | E     | E   | E     | K   | E      | K     | E   | G   | E      | E        | E   | E      | E    | D          | E         | E      | E     |
| 506 | T     | T   | T     | L   | T      | F     | T   | T   | T      | T        | T   | T      | S    | S          | T         | T      | T     |
| 507 | F     | F   | F     | F   | F      | F     | F   | F   | F      | F        | F   | F      | F    | F          | F         | F      | F     |

| No. | Human | Rat | Mouse | Cow | Rabbit | Sheep | Dog | Pig | Donkey | Elephant | Cat | Gerbil | Vole | Guinea Pig | Orangutan | Monkey | Horse |
|-----|-------|-----|-------|-----|--------|-------|-----|-----|--------|----------|-----|--------|------|------------|-----------|--------|-------|
| 508 | T     | T   | T     | T   | T      | T     | T   | T   | T      | T        | T   | T      | T    | T          | T         | T      | T     |
| 509 | F     | F   | F     | F   | F      | F     | F   | F   | F      | F        | F   | F      | F    | F          | F         | F      | F     |
| 510 | H     | H   | H     | H   | H      | H     | H   | H   | H      | H        | H   | H      | H    | H          | H         | H      | H     |
| 511 | A     | S   | S     | A   | A      | A     | A   | A   | A      | A        | A   | A      | A    | A          | A         | A      | A     |
| 512 | D     | D   | D     | D   | D      | D     | D   | D   | D      | D        | D   | N      | D    | D          | D         | D      | D     |
| 513 | I     | I   | I     | I   | I      | I     | L   | L   | I      | L        | L   | I      | I    | I          | I         | M      | I     |
| 514 | C     | C   | C     | C   | C      | C     | C   | C   | C      | C        | C   | C      | C    | C          | C         | C      | C     |
| 515 | T     | T   | T     | T   | T      | T     | T   | T   | T      | T        | T   | T      | T    | T          | T         | T      | T     |
| 516 | L     | L   | L     | L   | L      | L     | L   | L   | L      | L        | L   | L      | L    | L          | L         | L      | L     |
| 517 | S     | P   | P     | P   | P      | P     | P   | P   | P      | P        | P   | P      | P    | P          | S         | S      | P     |
| 518 | E     | D   | E     | D   | E      | D     | E   | E   | E      | E        | E   | E      | D    | E          | E         | E      | E     |
| 519 | K     | K   | K     | T   | T      | T     | A   | D   | D      | E        | A   | K      | K    | K          | K         | K      | D     |
| 520 | E     | E   | E     | E   | E      | E     | E   | E   | E      | Q        | E   | E      | E    | E          | E         | E      | E     |
| 521 | R     | K   | K     | K   | R      | K     | K   | K   | K      | K        | K   | K      | K    | K          | R         | K      | K     |
| 522 | Q     | Q   | Q     | Q   | K      | Q     | Q   | Q   | Q      | Q        | Q   | Q      | Q    | Q          | Q         | Q      | Q     |
| 523 | I     | I   | I     | I   | I      | I     | V   | I   | I      | I        | I   | M      | I    | V          | I         | V      | I     |
| 524 | K     | K   | K     | K   | K      | K     | K   | K   | K      | K        | K   | E      | K    | K          | K         | K      | K     |
| 525 | K     | K   | K     | K   | K      | K     | K   | K   | K      | K        | K   | K      | K    | K          | K         | K      | K     |
| 526 | Q     | Q   | Q     | Q   | Q      | Q     | Q   | Q   | Q      | Q        | Q   | Q      | Q    | Q          | Q         | Q      | Q     |
| 527 | T     | T   | T     | T   | T      | T     | T   | T   | S      | S        | S   | T      | T    | M          | T         | T      | S     |
| 528 | A     | A   | A     | A   | A      | A     | A   | A   | A      | V        | A   | A      | A    | A          | A         | A      | A     |
| 529 | L     | L   | L     | L   | L      | L     | L   | L   | L      | L        | L   | L      | L    | L          | L         | L      | L     |
| 530 | V     | A   | A     | V   | V      | V     | V   | V   | A      | V        | V   | A      | A    | V          | V         | V      | A     |
| 531 | E     | E   | E     | E   | E      | E     | E   | E   | E      | E        | E   | E      | E    | E          | E         | E      | E     |
| 532 | L     | L   | L     | L   | L      | L     | L   | L   | L      | L        | L   | L      | L    | L          | L         | L      | L     |
| 533 | V     | V   | V     | L   | V      | L     | L   | L   | V      | V        | L   | V      | V    | V          | V         | V      | V     |
| 534 | K     | K   | K     | K   | K      | K     | K   | K   | K      | K        | K   | K      | K    | K          | K         | K      | K     |
| 535 | H     | H   | H     | H   | H      | H     | H   | H   | H      | H        | H   | H      | H    | H          | H         | H      | H     |
| 536 | K     | K   | K     | K   | K      | K     | K   | K   | K      | K        | K   | K      | K    | K          | K         | K      | K     |
| 537 | P     | P   | P     | P   | P      | P     | P   | P   | P      | P        | P   | P      | P    | P          | P         | P      | P     |
| 538 | K     | K   | K     | K   | H      | K     | K   | H   | K      | K        | K   | Q      | K    | K          | K         | K      | K     |
| 539 | A     | A   | A     | A   | A      | A     | A   | A   | A      | A        | A   | A      | A    | A          | A         | A      | A     |
| 540 | T     | T   | T     | T   | T      | T     | T   | T   | T      | T        | T   | T      | T    | S          | T         | T      | T     |
| 541 | K     | E   | A     | E   | N      | D     | D   | E   | K      | D        | E   | E      | G    | E          | K         | K      | K     |
| 542 | E     | D   | E     | E   | D      | E     | E   | E   | E      | E        | E   | E      | D    | E          | E         | E      | E     |
| 543 | Q     | Q   | Q     | Q   | Q      | Q     | Q   | Q   | Q      | Q        | Q   | Q      | Q    | Q          | Q         | Q      | Q     |
| 544 | L     | L   | L     | L   | L      | L     | L   | L   | L      | L        | L   | L      | L    | M          | L         | L      | L     |
| 545 | K     | K   | K     | K   | K      | K     | K   | R   | K      | K        | K   | K      | K    | K          | K         | K      | K     |
| 546 | A     | T   | T     | T   | T      | T     | T   | T   | T      | T        | T   | K      | T    | T          | A         | G      | T     |
| 547 | V     | V   | V     | V   | V      | V     | V   | V   | V      | V        | V   | V      | V    | V          | V         | V      | V     |
| 548 | M     | M   | M     | M   | V      | M     | M   | L   | L      | T        | M   | M      | M    | M          | M         | M      | L     |

| No. | Human | Rat | Mouse | Cow | Rabbit | Sheep | Dog | Pig | Donkey | Elephant | Cat | Gerbil | Vole | Guinea Pig | Orangutan | Monkey | Horse |
|-----|-------|-----|-------|-----|--------|-------|-----|-----|--------|----------|-----|--------|------|------------|-----------|--------|-------|
| 549 | D     | G   | D     | E   | G      | E     | G   | G   | G      | G        | G   | G      | G    | G          | D         | D      | G     |
| 550 | D     | D   | D     | N   | E      | N     | D   | N   | N      | Q        | D   | D      | E    | D          | D         | N      | N     |
| 551 | F     | F   | F     | F   | F      | F     | F   | F   | F      | F        | F   | F      | F    | F          | F         | F      | F     |
| 552 | A     | A   | A     | V   | T      | V     | G   | A   | S      | T        | G   | A      | S    | A          | A         | A      | S     |
| 553 | A     | Q   | Q     | A   | A      | A     | A   | A   | A      | G        | S   | E      | A    | A          | A         | A      | A     |
| 554 | F     | F   | F     | F   | L      | F     | F   | F   | F      | M        | F   | F      | F    | F          | F         | F      | F     |
| 555 | V     | V   | L     | V   | L      | V     | V   | V   | V      | V        | V   | L      | L    | L          | V         | V      | V     |
| 556 | E     | D   | D     | D   | D      | D     | E   | Q   | A      | E        | D   | E      | E    | K          | E         | E      | A     |
| 557 | K     | K   | T     | K   | K      | K     | K   | K   | K      | K        | K   | K      | K    | K          | K         | K      | K     |
| 558 | C     | C   | C     | C   | C      | C     | C   | C   | C      | C        | C   | C      | C    | C          | C         | C      | C     |
| 559 | C     | C   | C     | C   | C      | C     | C   | C   | C      | C        | C   | C      | C    | C          | C         | C      | C     |
| 560 | K     | K   | K     | A   | S      | A     | A   | A   | G      | A        | A   | K      | K    | D          | K         | K      | G     |
| 561 | A     | A   | A     | A   | A      | A     | A   | A   | A      | A        | A   | Q      | A    | A          | A         | A      | R     |
| 562 | D     | A   | A     | D   | E      | D     | E   | P   | E      | E        | E   | E      | D    | D          | D         | D      | E     |
| 563 | D     | D   | D     | D   | D      | D     | N   | D   | D      | D        | D   | D      | D    | N          | D         | D      | D     |
| 564 | K     | K   | K     | K   | K      | K     | K   | H   | K      | K        | K   | K      | K    | K          | K         | K      | K     |
| 565 | E     | D   | D     | E   | E      | E     | E   | E   | E      | E        | E   | E      | E    | E          | E         | E      | E     |
| 566 | T     | N   | T     | A   | A      | G     | G   | A   | A      | A        | A   | A      | A    | A          | T         | A      | A     |
| 567 | C     | C   | C     | C   | C      | C     | C   | C   | C      | C        | C   | C      | C    | C          | C         | C      | C     |
| 568 | F     | F   | F     | F   | F      | F     | F   | F   | F      | F        | F   | F      | F    | F          | F         | F      | F     |
| 569 | A     | A   | S     | A   | A      | V     | S   | A   | A      | A        | A   | S      | S    | T          | A         | A      | A     |
| 570 | E     | T   | T     | V   | V      | L     | E   | V   | E      | E        | E   | T      | E    | E          | E         | E      | E     |
| 571 | E     | E   | E     | E   | E      | E     | E   | E   | E      | E        | E   | E      | E    | D          | E         | E      | E     |
| 572 | G     | G   | G     | G   | G      | G     | G   | G   | G      | G        | G   | G      | G    | G          | G         | G      | G     |
| 573 | K     | P   | P     | P   | P      | P     | P   | P   | P      | P        | P   | P      | P    | P          | K         | P      | P     |
| 574 | K     | N   | N     | K   | K      | K     | K   | K   | K      | K        | K   | K      | K    | K          | K         | K      | K     |
| 575 | L     | L   | L     | L   | L      | L     | L   | F   | L      | L        | L   | L      | L    | L          | L         | F      | L     |
| 576 | V     | V   | V     | V   | V      | V     | V   | V   | V      | V        | V   | V      | V    | V          | V         | V      | V     |
| 577 | A     | A   | T     | V   | E      | A     | A   | I   | A      | T        | A   | A      | A    | A          | A         | A      | A     |
| 578 | A     | R   | R     | S   | S      | S     | A   | E   | S      | A        | A   | E      | T    | K          | A         | A      | S     |
| 579 | S     | S   | C     | T   | S      | T     | A   | I   | S      | S        | A   | S      | S    | C          | S         | S      | S     |
| 580 | Q     | K   | K     | Q   | K      | Q     | Q   | R   | Q      | Q        | Q   | Q      | Q    | Q          | Q         | Q      | Q     |
| 581 | A     | E   | D     | T   | A      | A     | A   | G   | L      | A        | A   | K      | A    | A          | A         | A      | L     |
| 582 | A     | A   | A     | A   | T      | A     | A   | I   | A      | A        | A   | A      | A    | T          | A         | A      | A     |
| 583 | L     | L   | L     | L   | L      | L     | L   | L   | L      | L        | L   | L      | L    | L          | L         | L      | L     |
| 584 | G     | A   | A     | A   | G      | A     |     | A   | A      |          | A   | A      |      | A          | G         | A      | A     |
| 585 | L     |     |       |     |        |       |     |     |        |          |     |        |      |            | L         |        |       |

C-Terminus
